# Supplementary material for: Expansion and Diversification of Fluorescent Protein Genes in Fifteen Acropora Species during the Evolution of Acroporid Corals
Source: PubMed Central journal article supplement (PMC8001845; doi:10.3390/genes12030397), 2021-03-11
Supplement: genes-12-00397-s001.pdf [file genes-12-00397-s001.pdf]

A

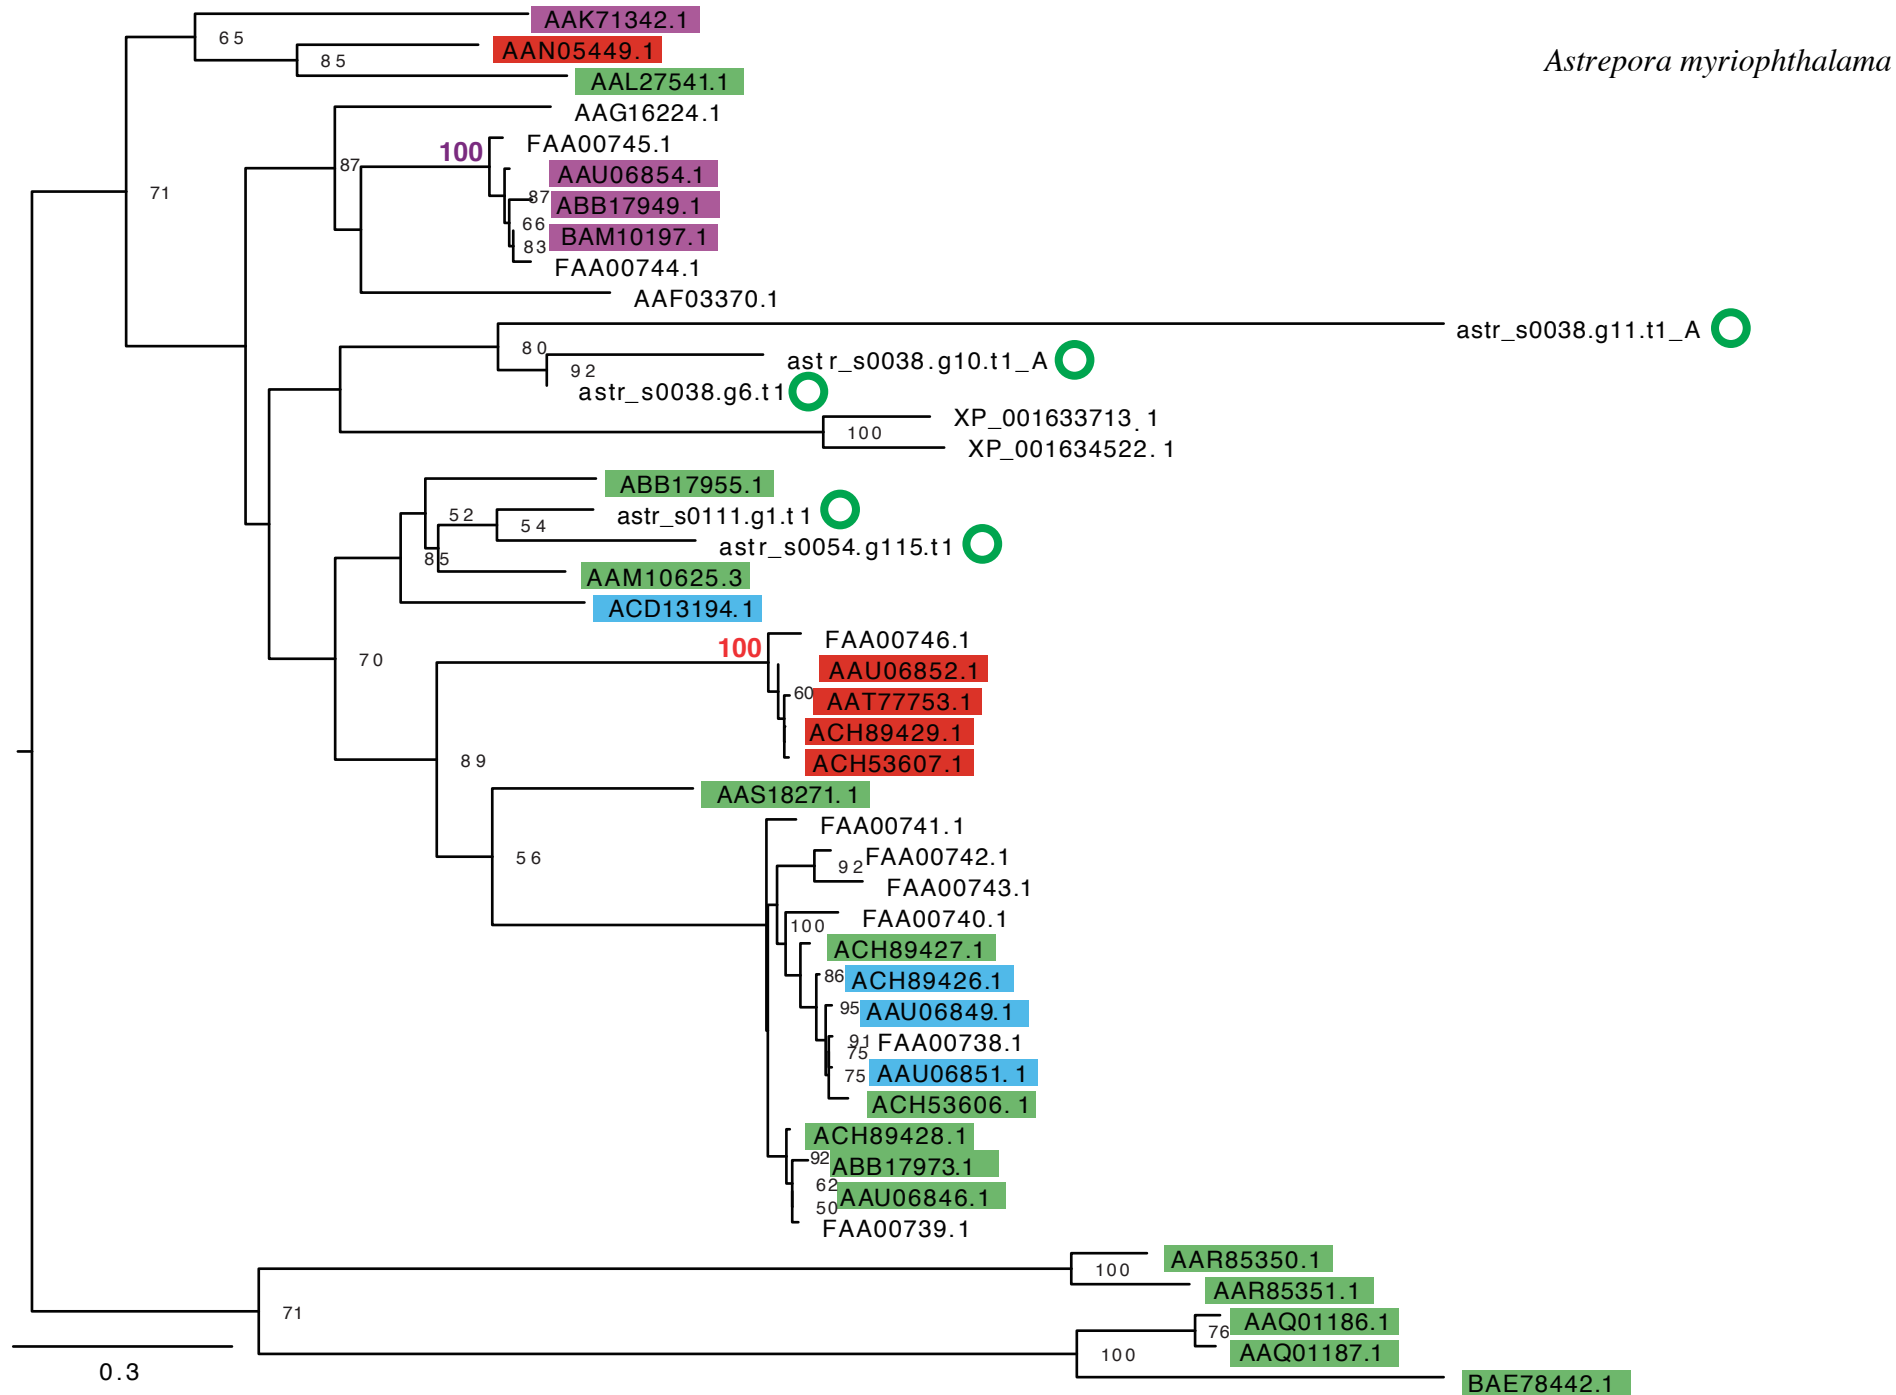

Figure S1. FP molecular phylogeny of 15 species of *Acropora*, two *Montipora*, and one *Astreopora* in the family Acroporidae.

FP molecular phylogenetic trees in *Astreopora* (A), two *Montipora* (B-C), and 15 species of *Acropora* (D-R) were generated separately for each taxon. Confirmed fluorescent protein colors are indicated by highlighting (See also Table 1). Predicted GFP/CFP, RFP, and Chrp proteins are marked with green, red and purple circles, respectively. Bootstrap values  $\geq 50\%$  are indicated at each node. RFPs and Chrps clades with high bootstrap values ( $\geq 90\%$ ) are indicated by red or purple numbers, respectively. Protein IDs are labeled with the first letter of the generic name and a three-letter abbreviation of specific epithet (e.g., aten for *Acropora tenuis*), except for astr for *Astreopora myriophthalam*.

B

*Montipora efflorescens*

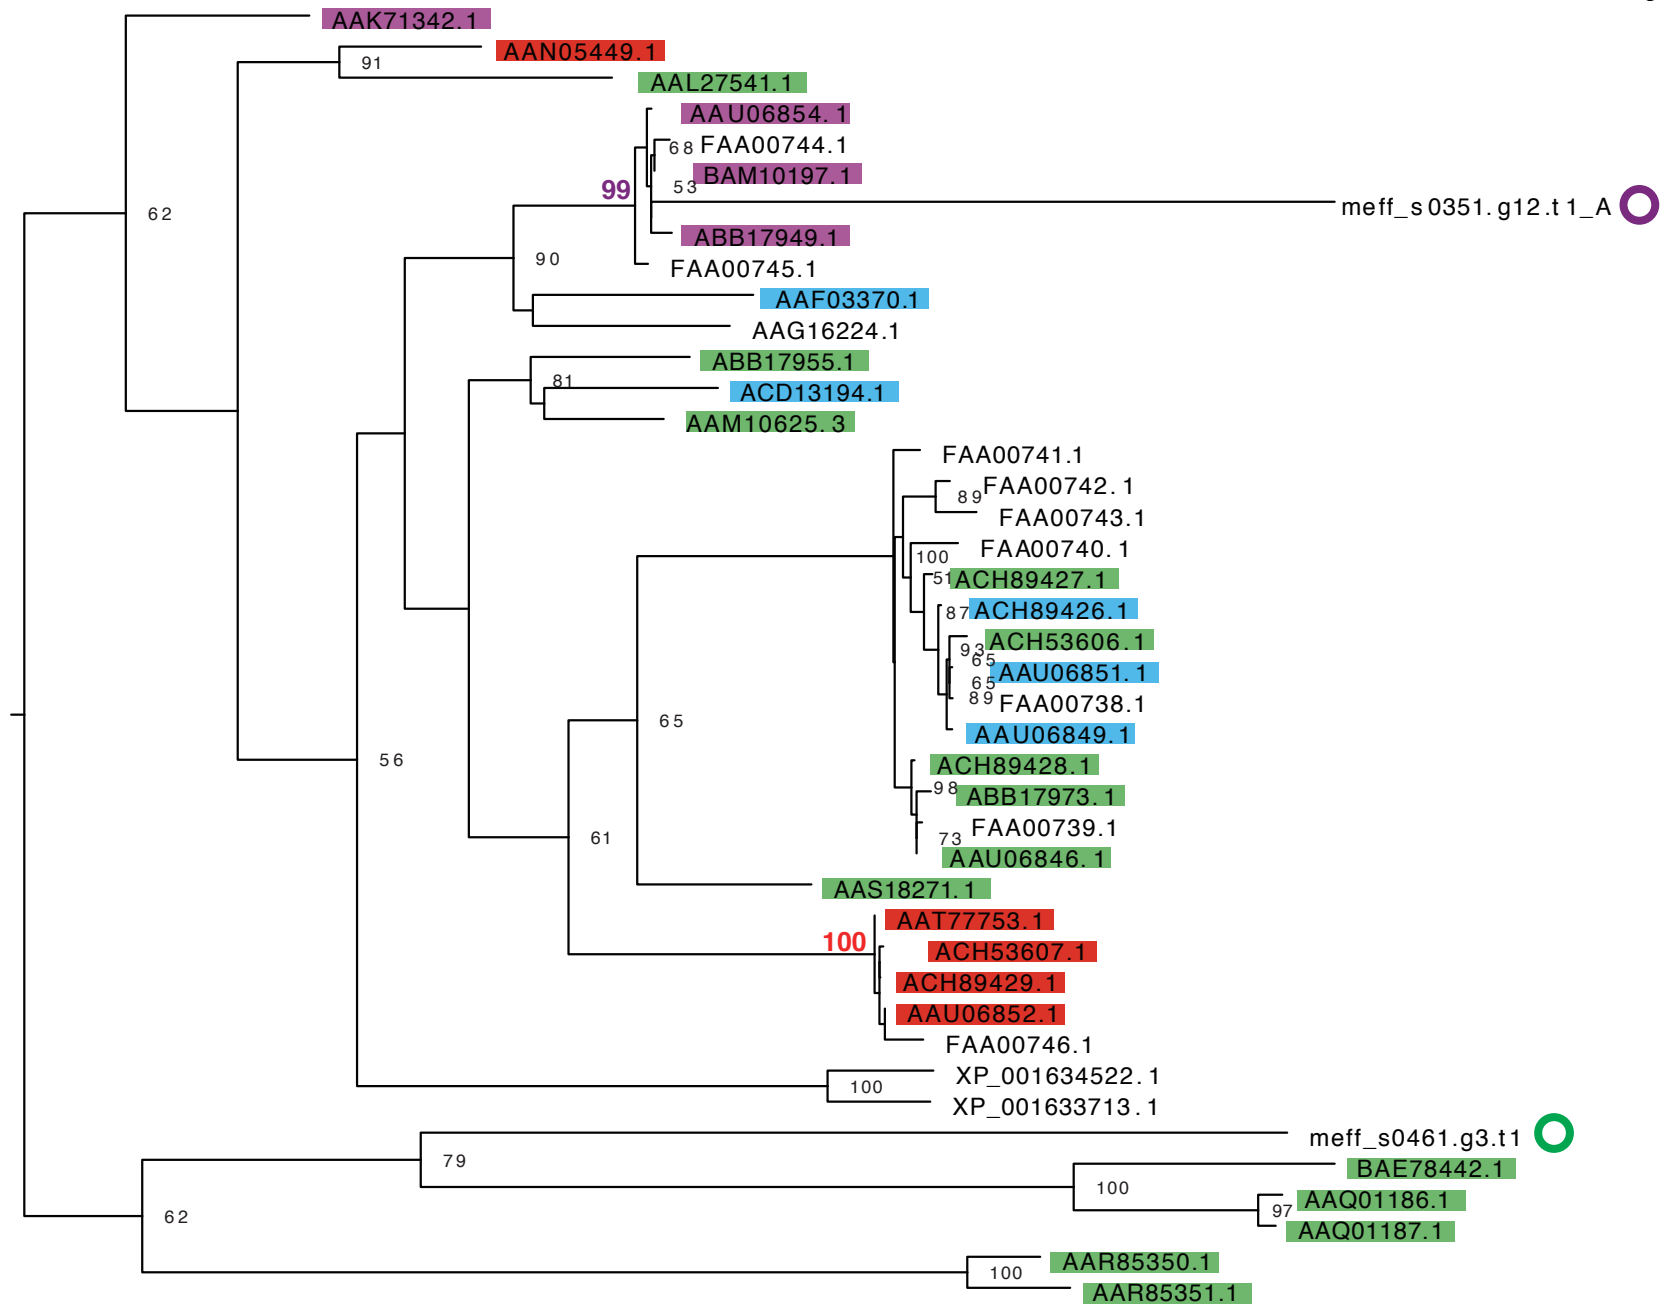

0.4

C

*Montipora cactus*

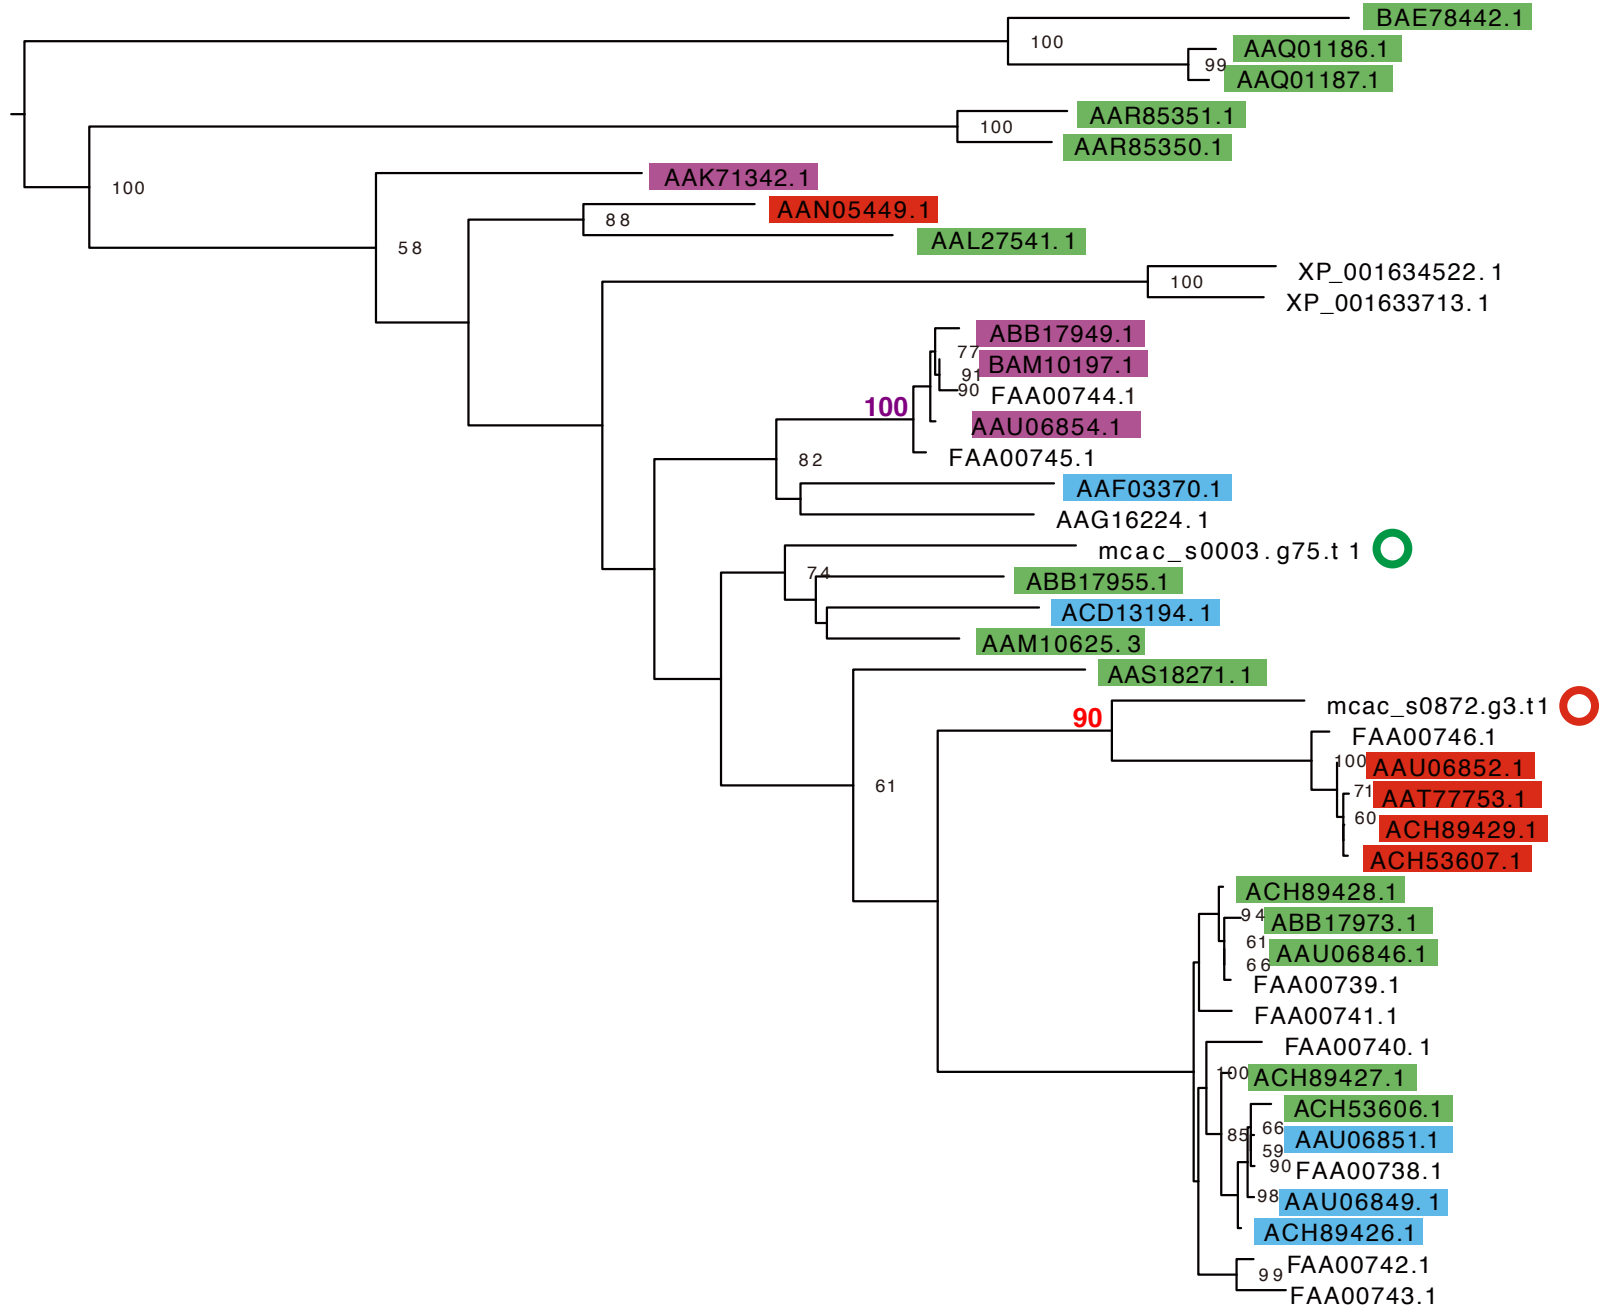

0.4

D

*A. tenuis*

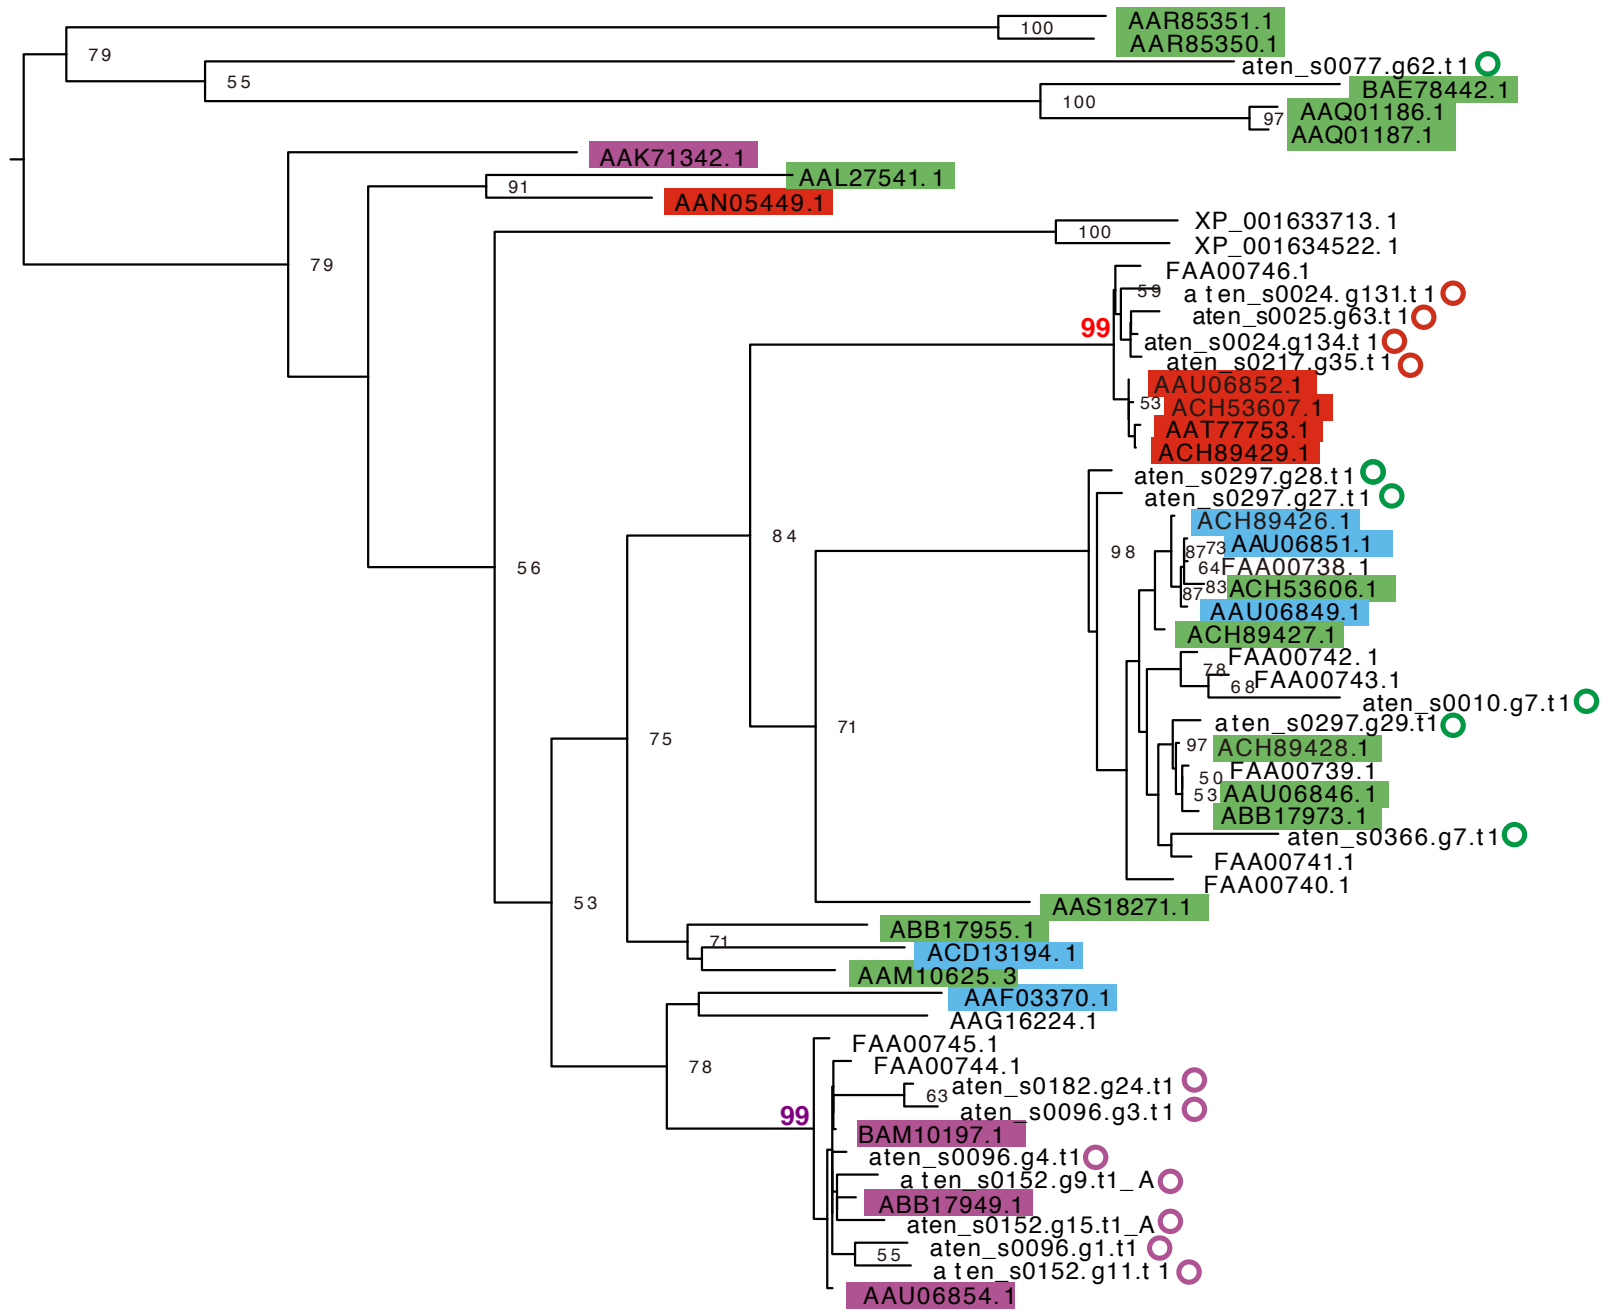

0.3

E

*A. yongei*

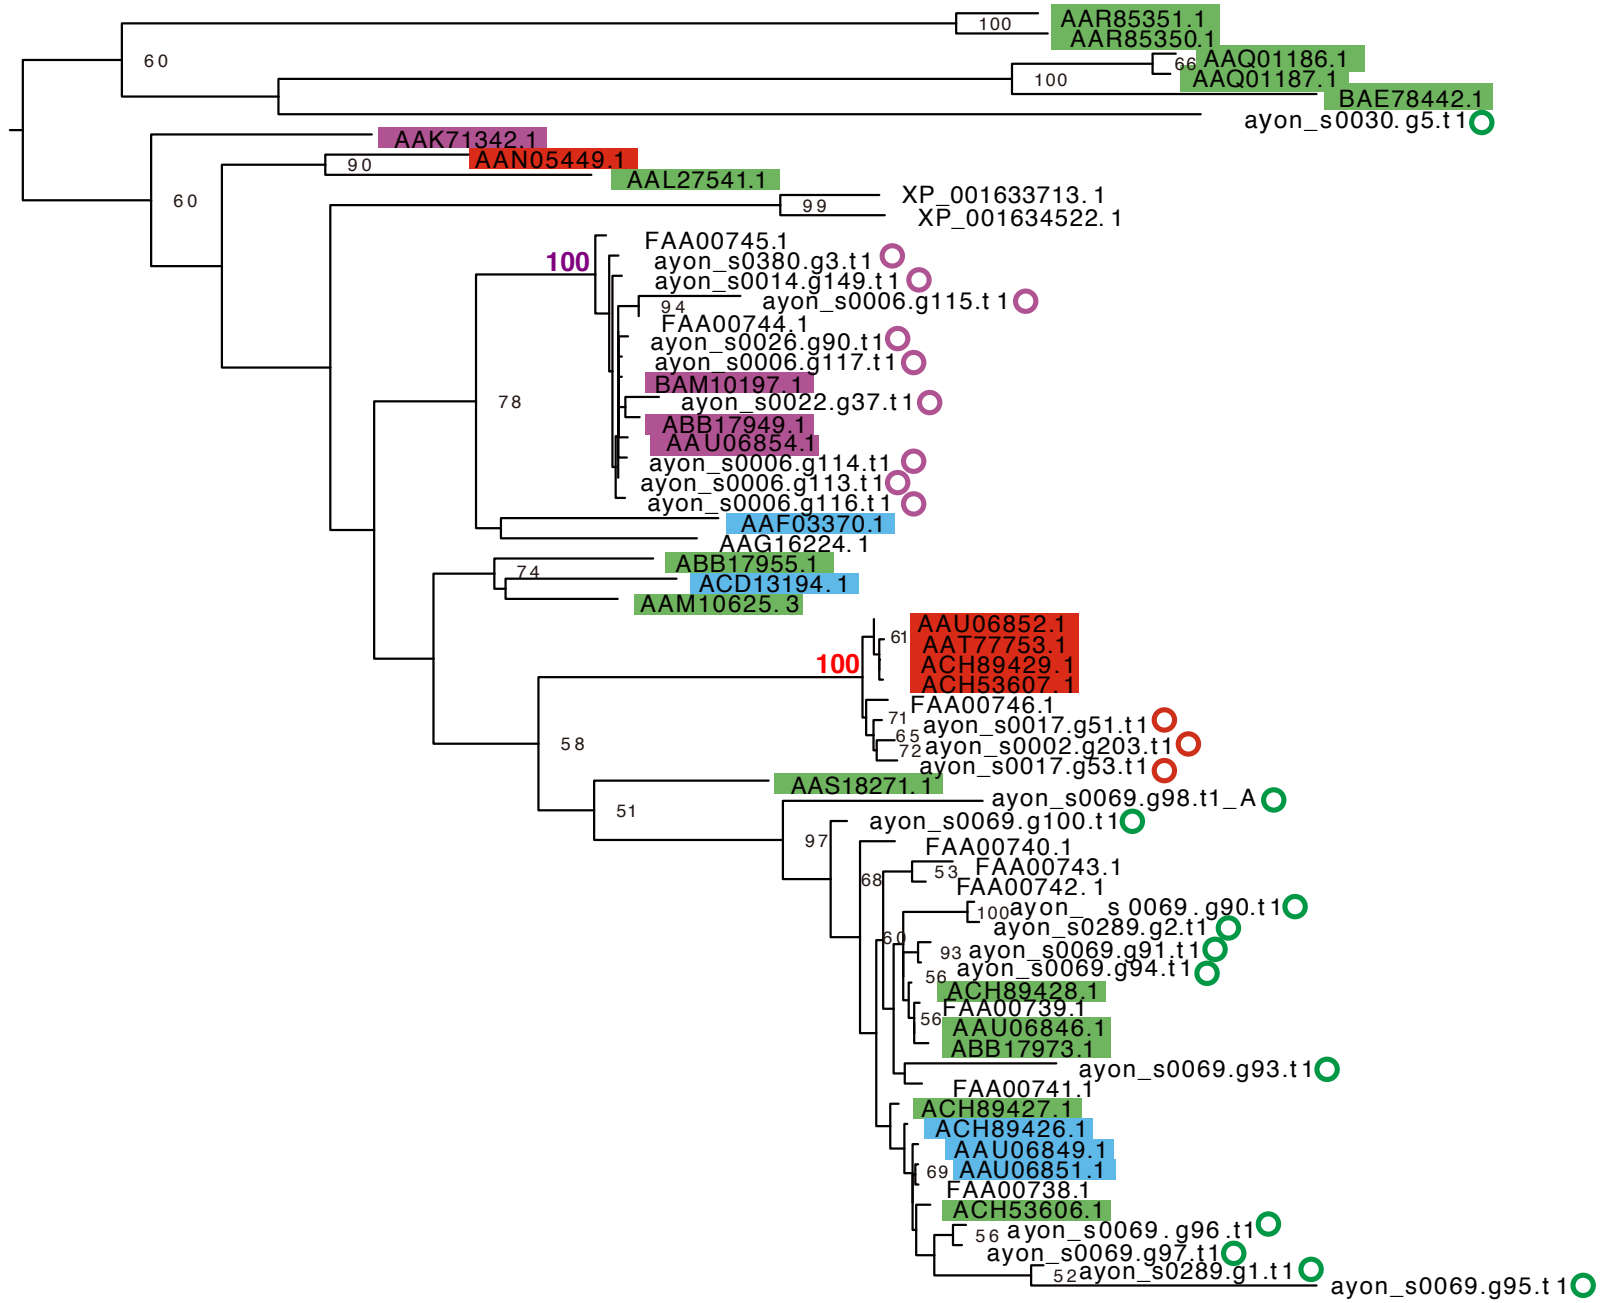

0.4

F

*A. intermedia*

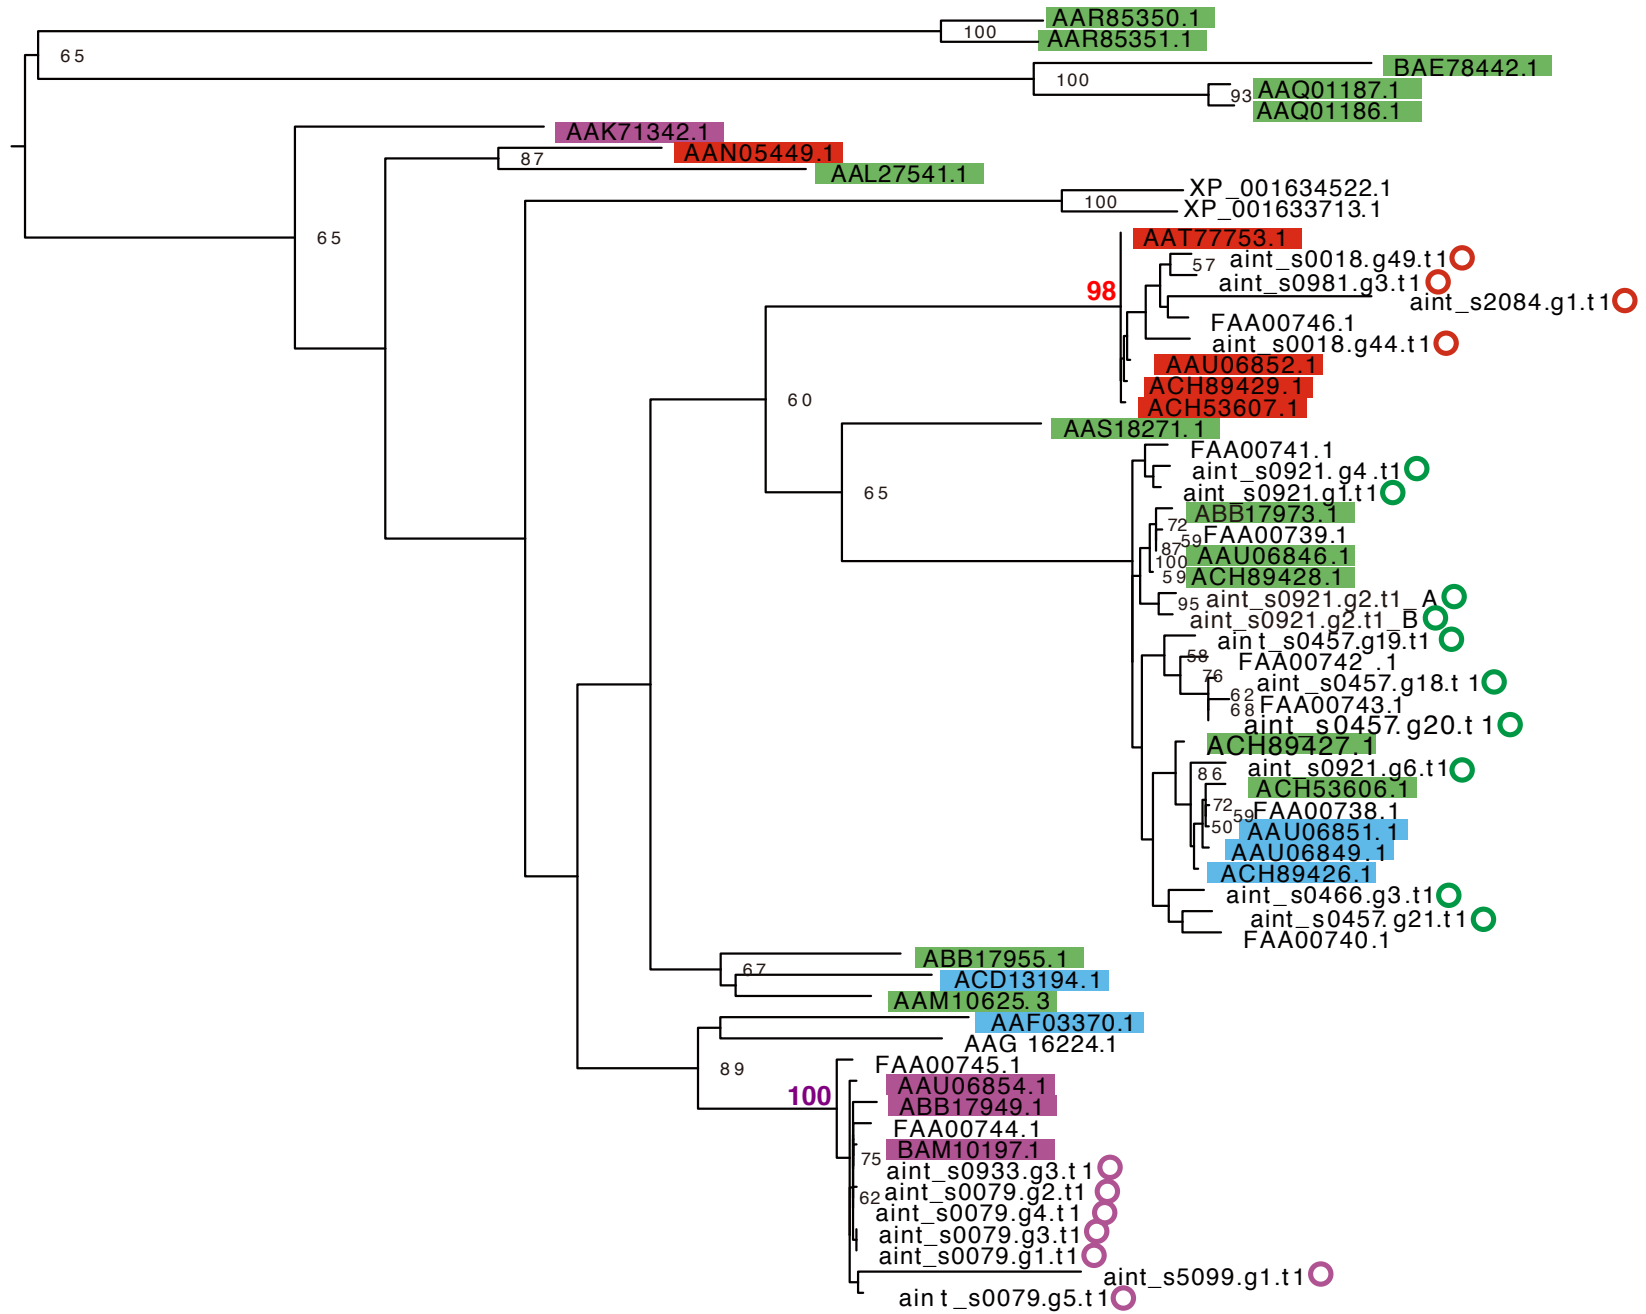

0.3

G

*A. gemmifera*

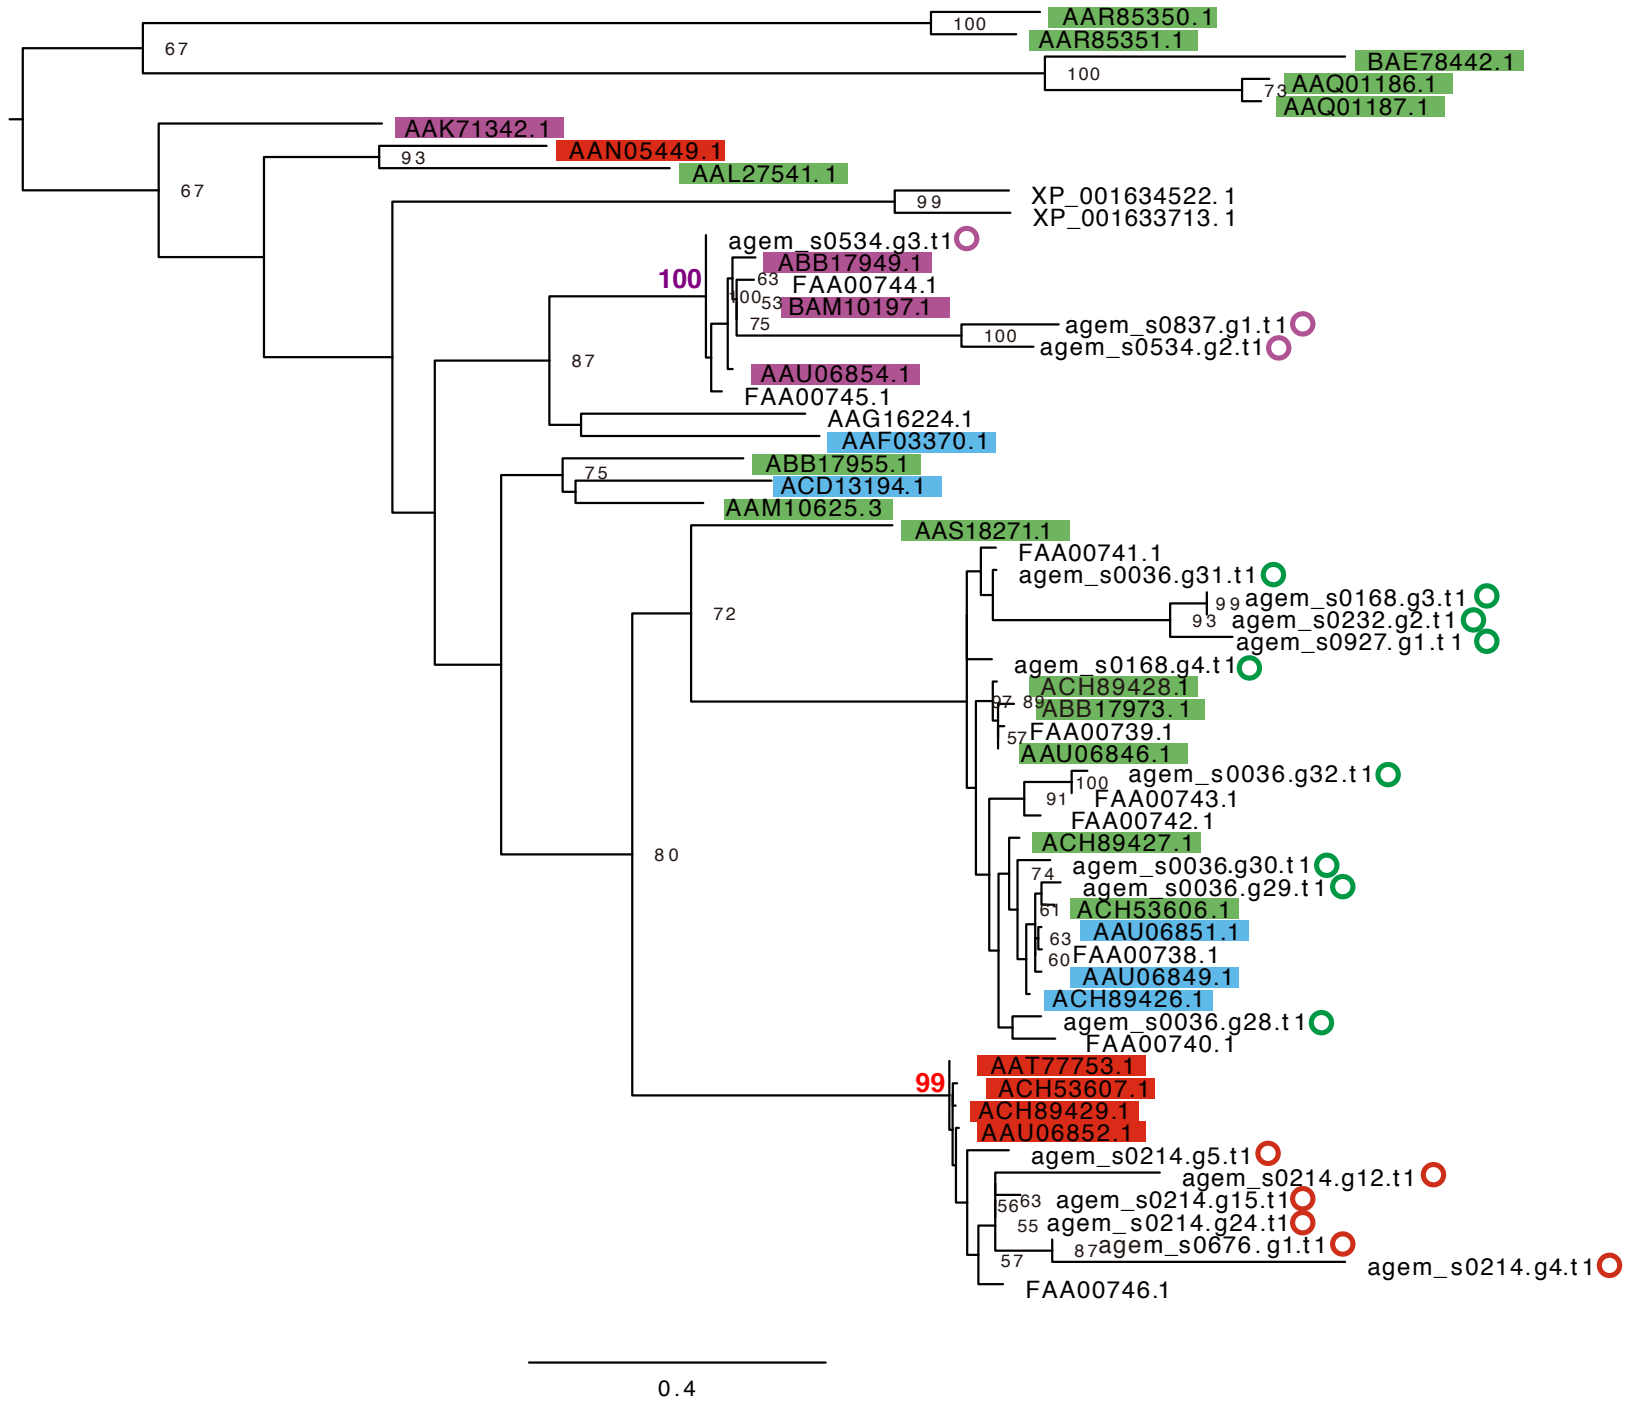

H

*A. awi*

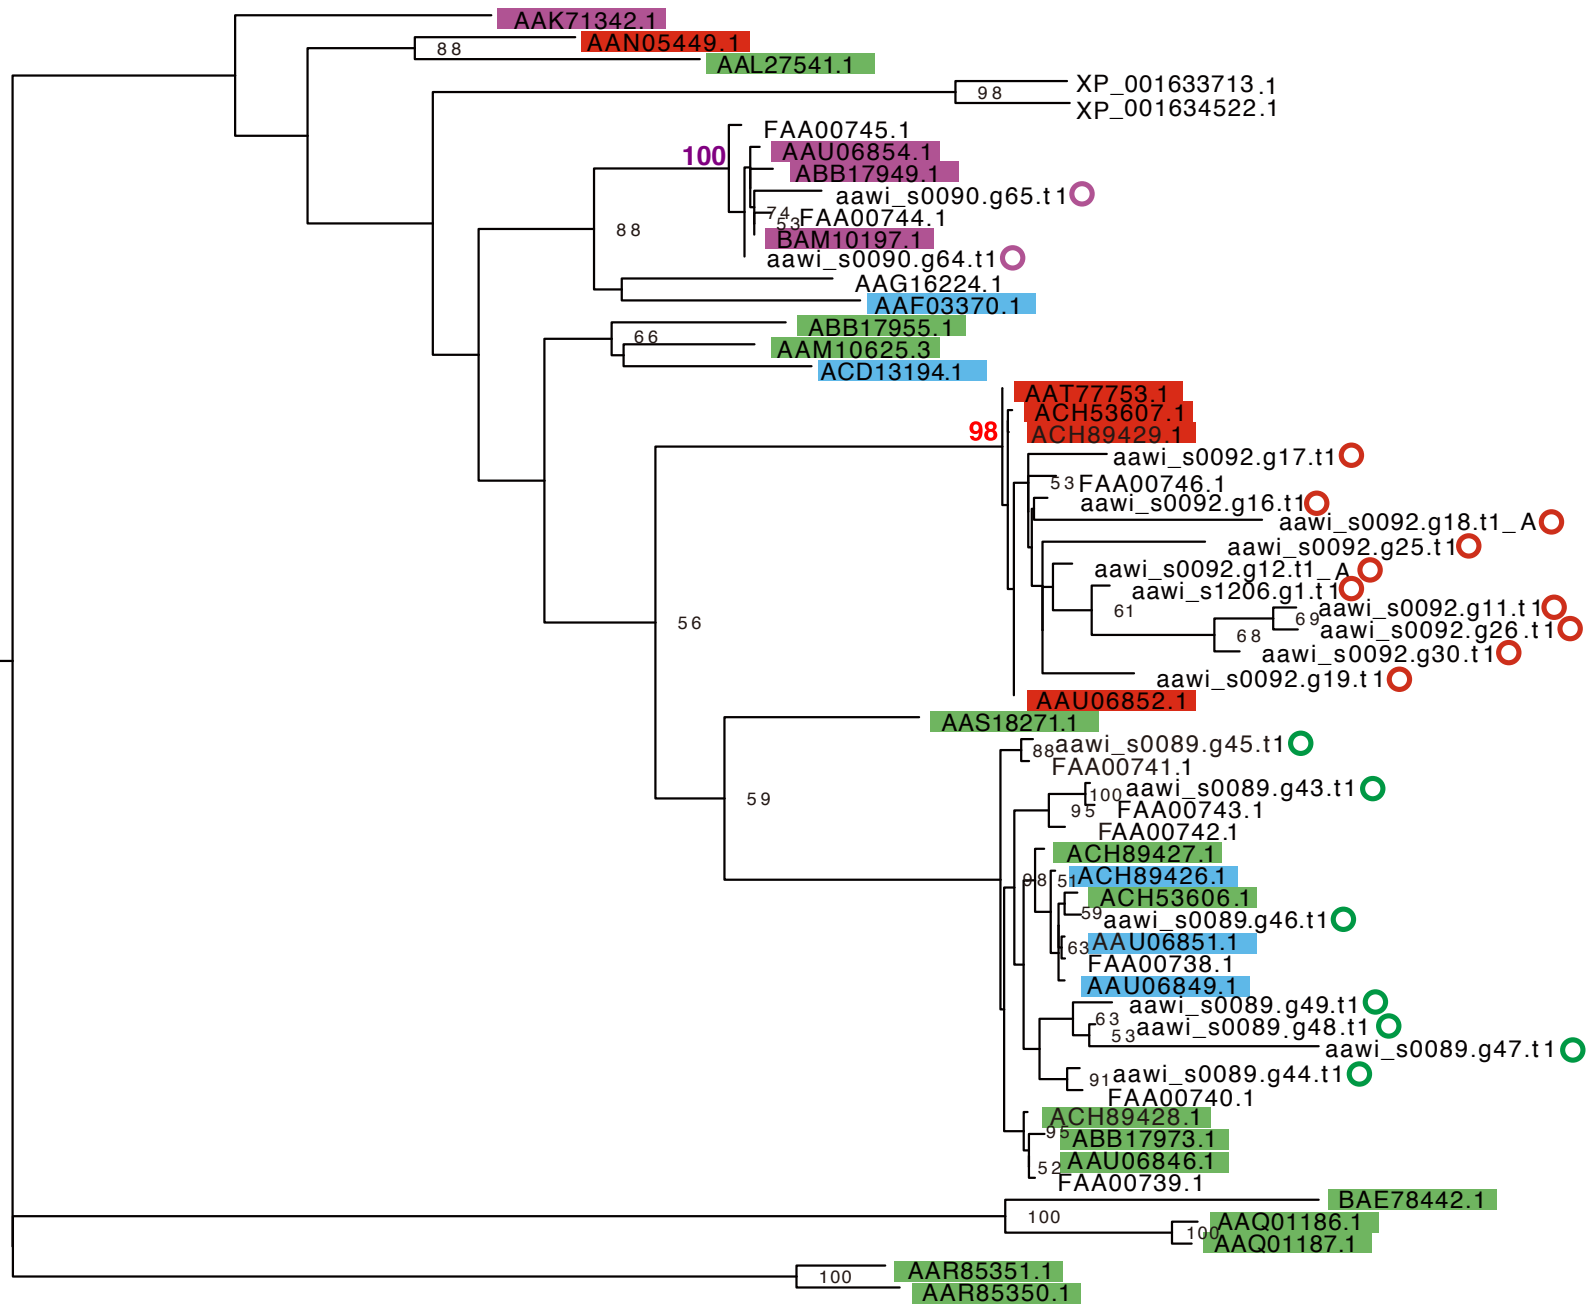

0.4



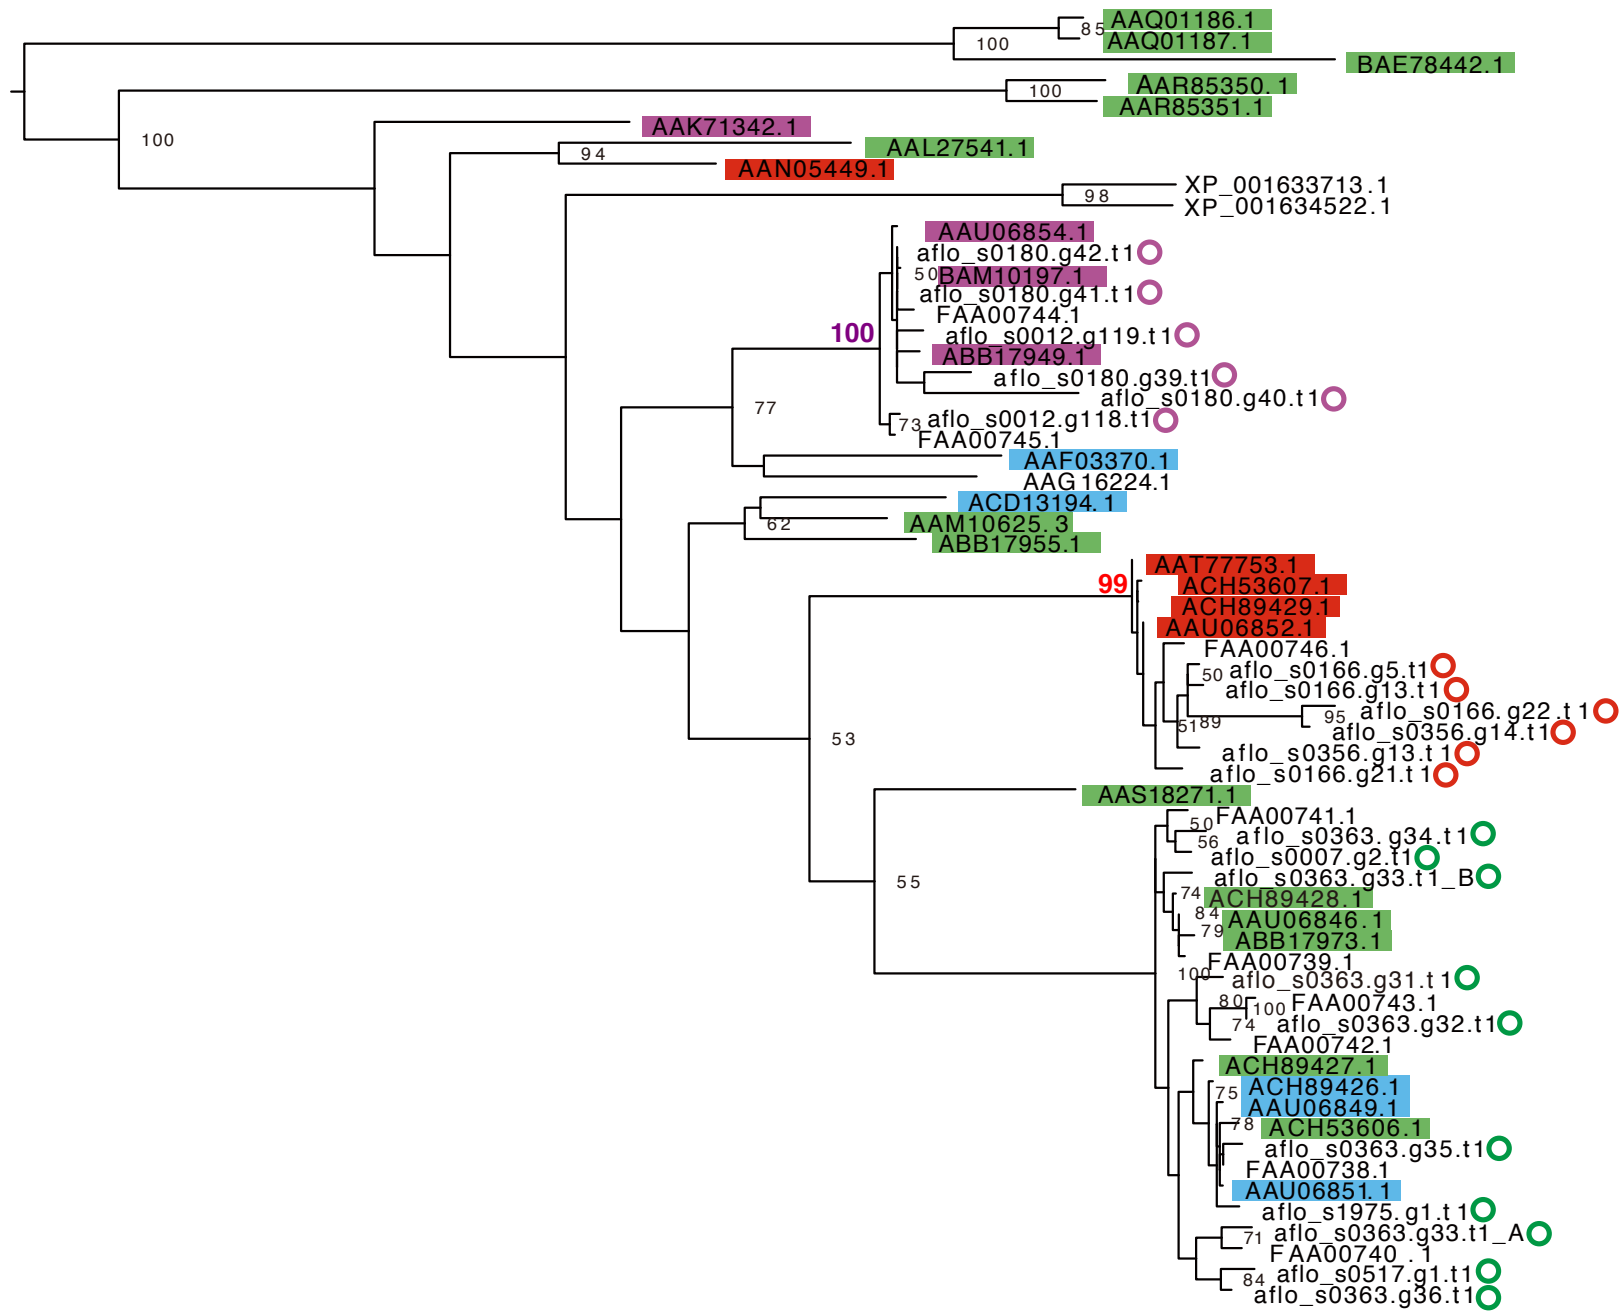

0.4

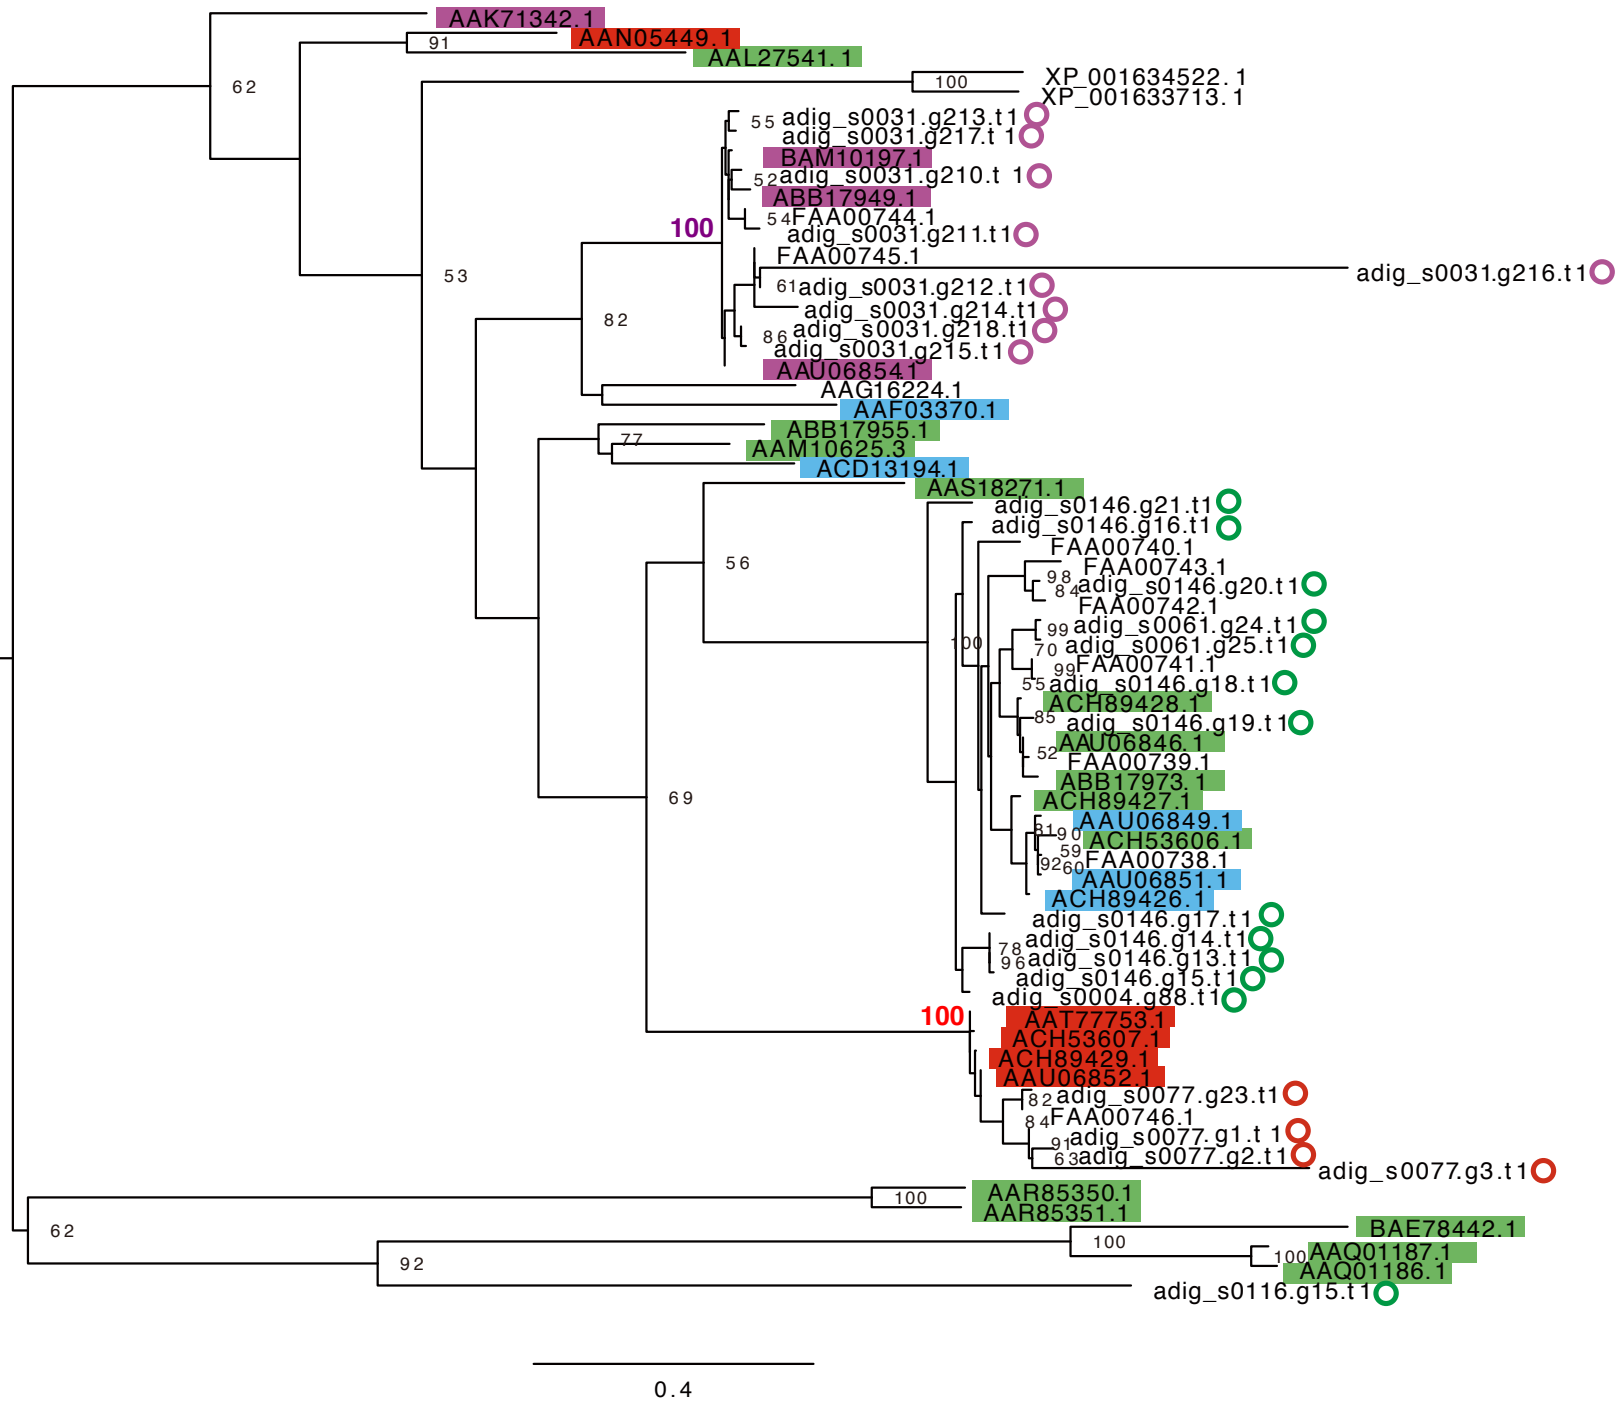

K

*A. nasuta*

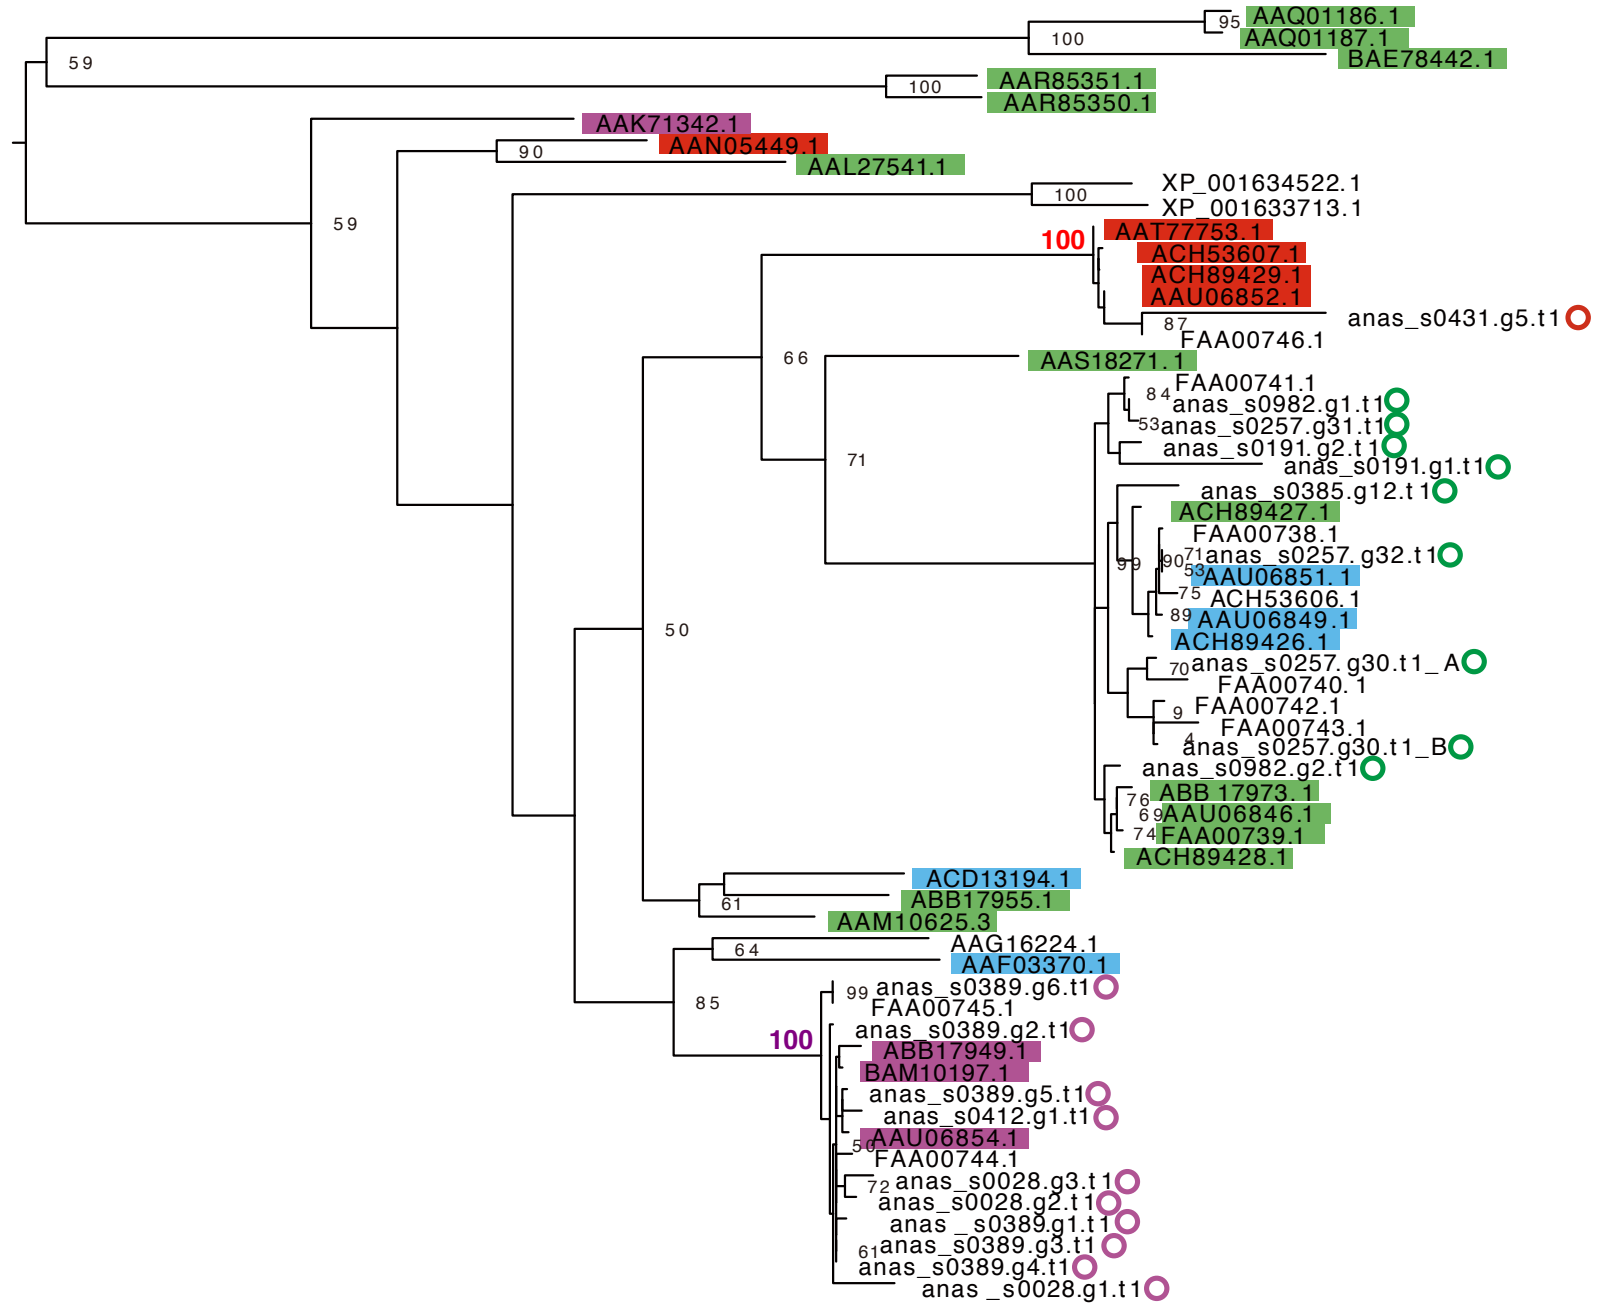

0.4

L

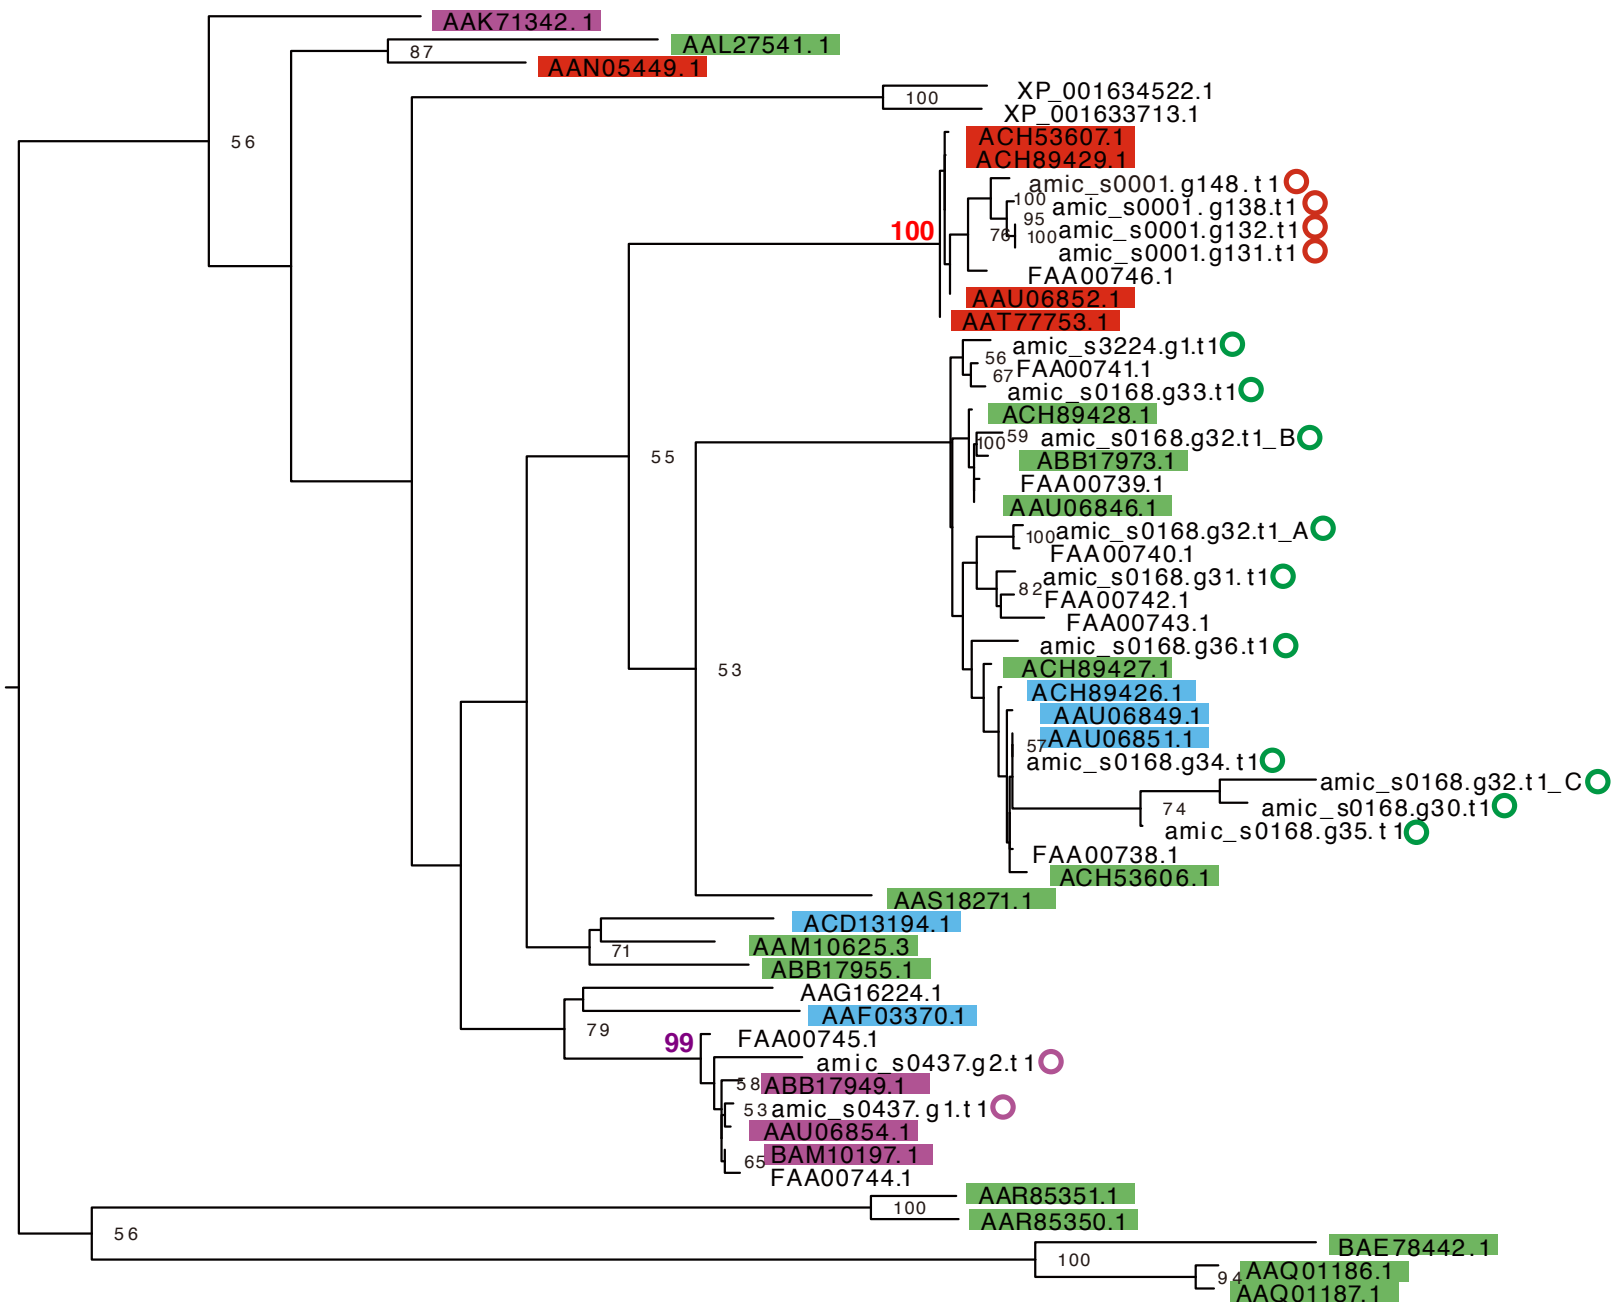

0.4

M

*A. acuminata*

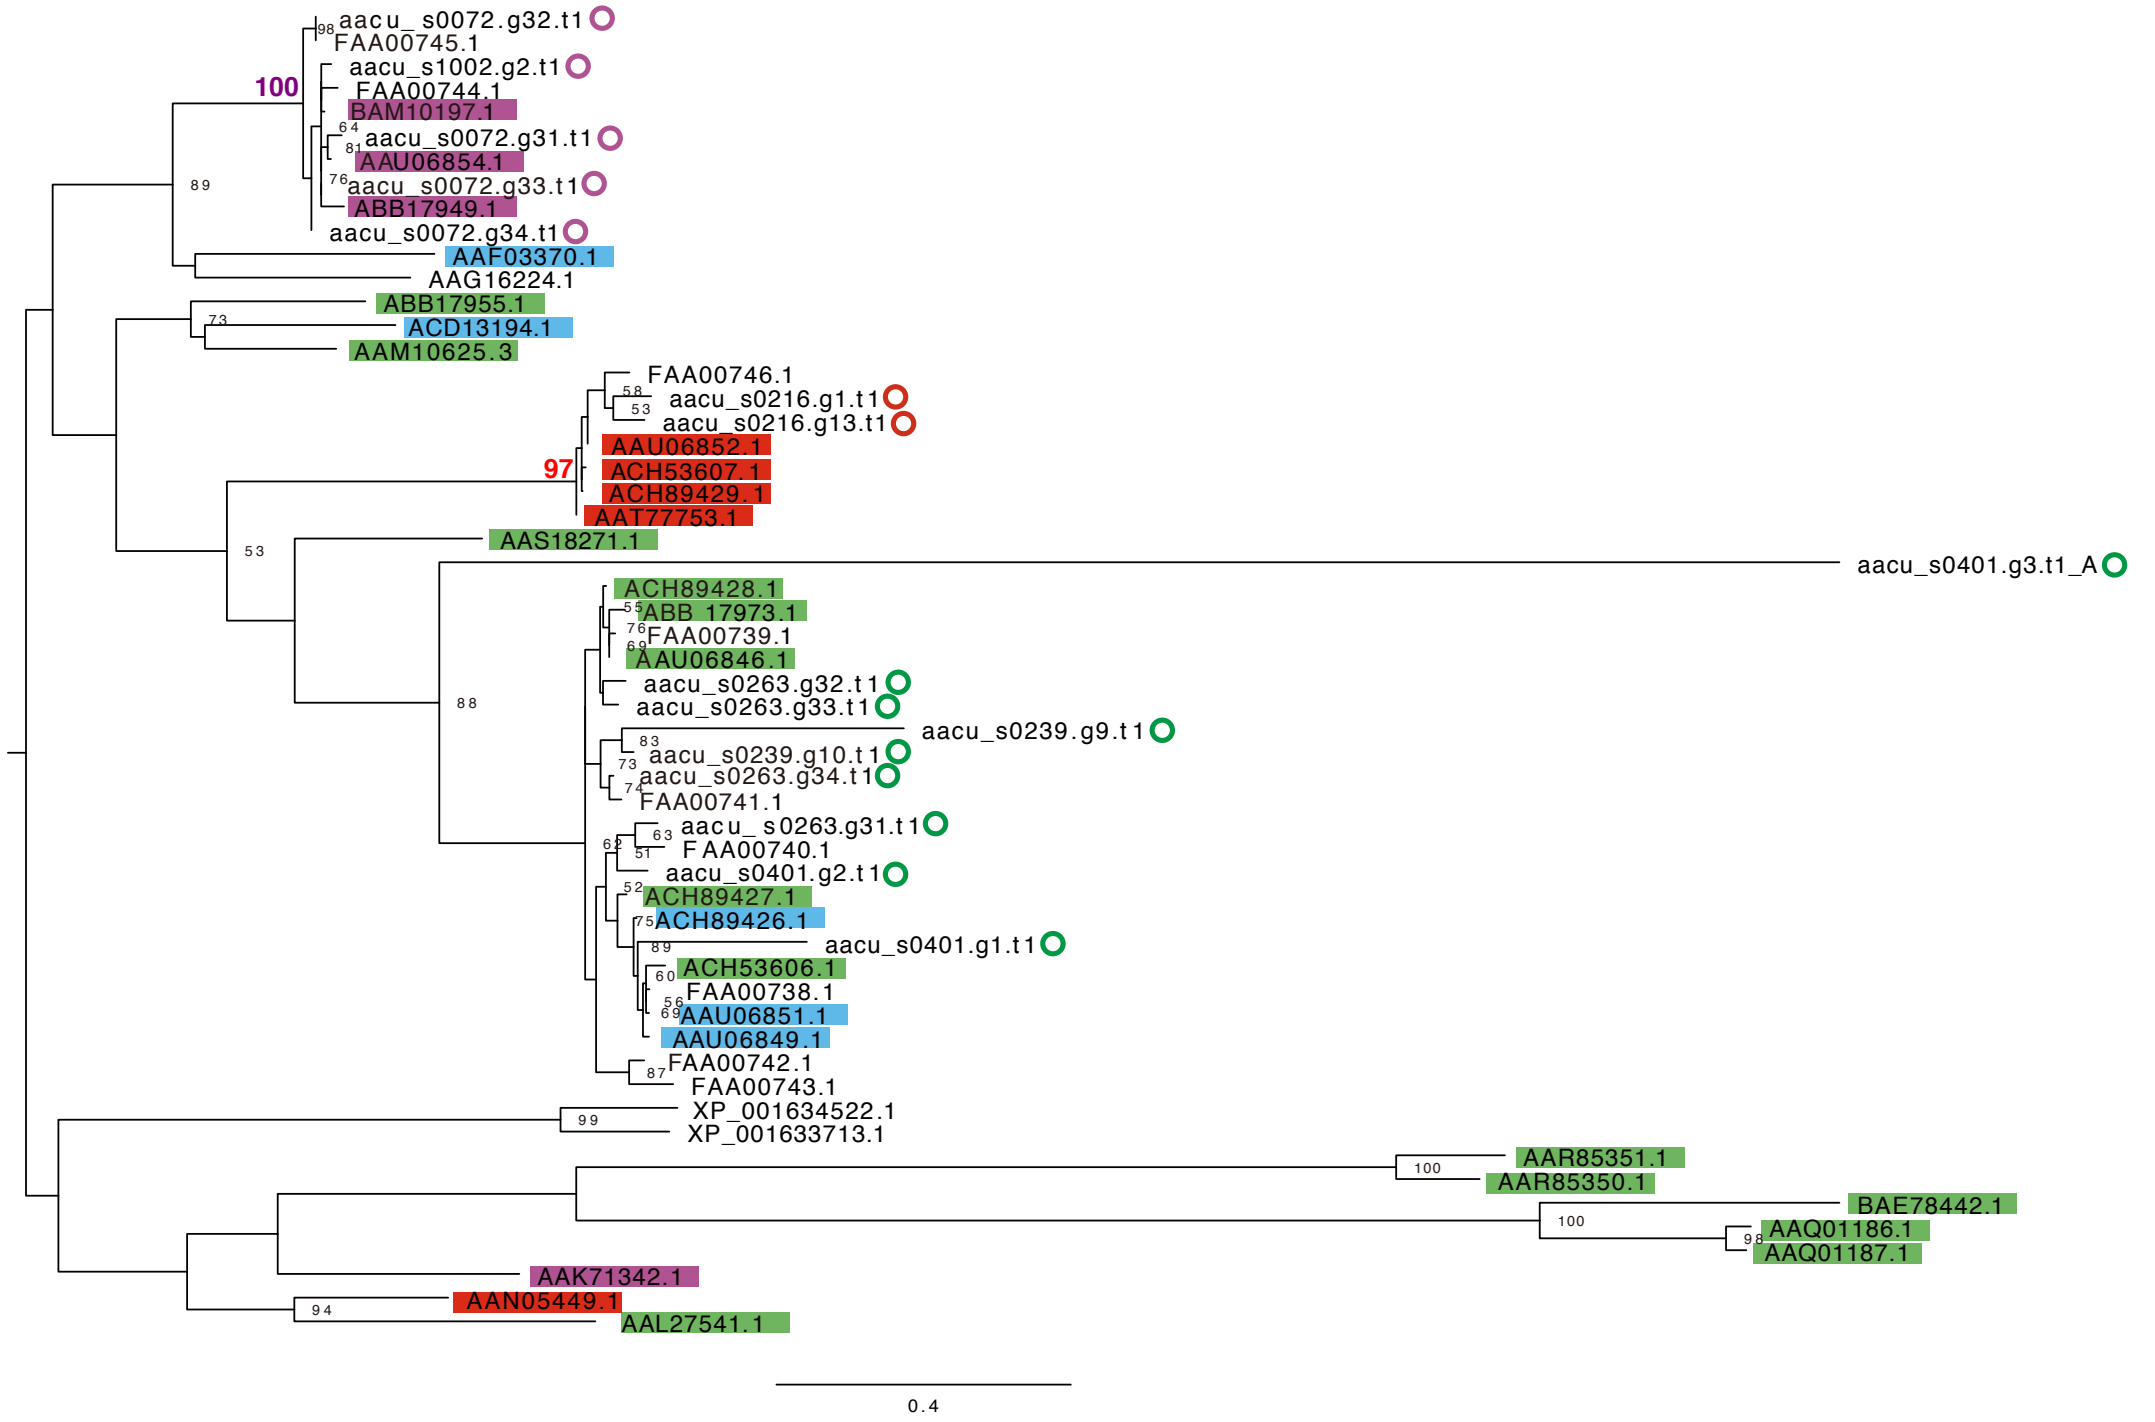

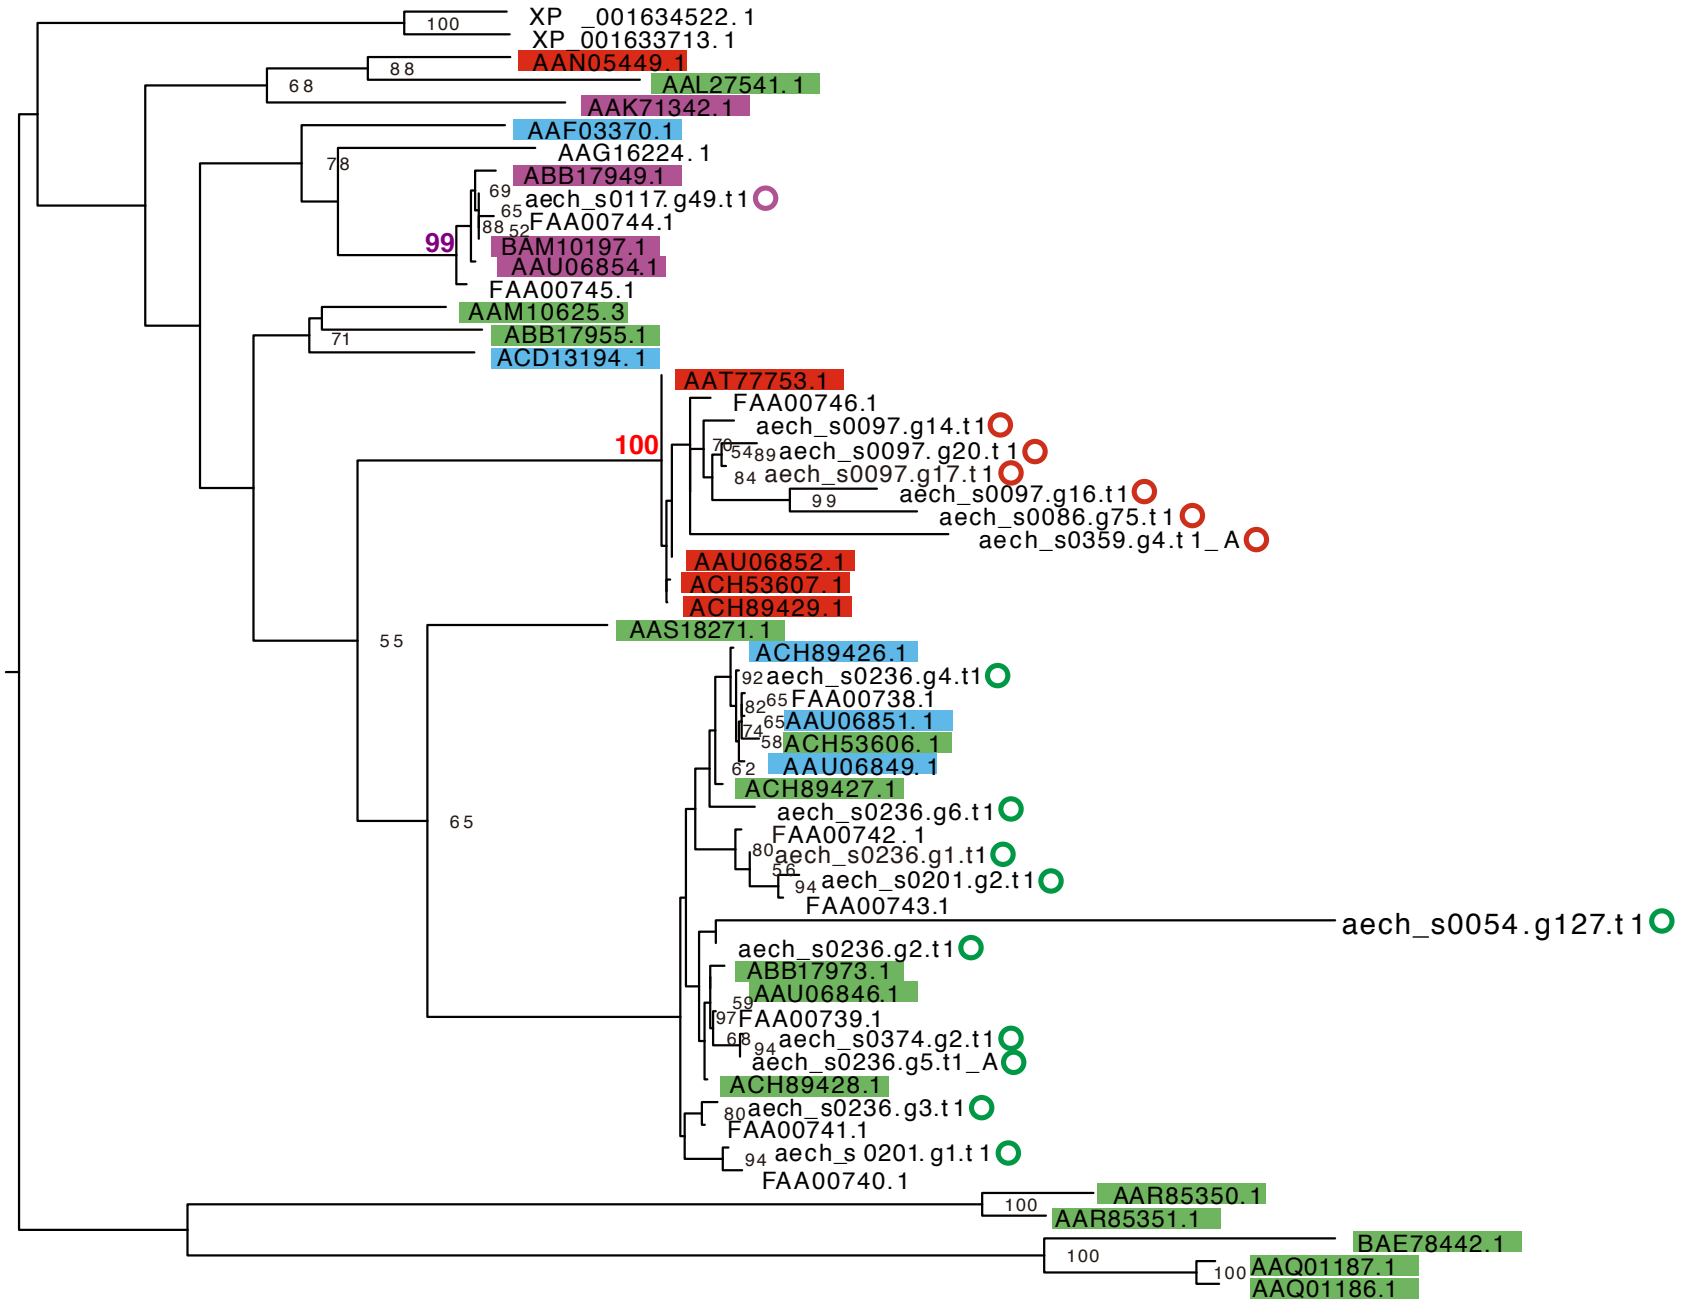

0.4

O

*A. muricata*

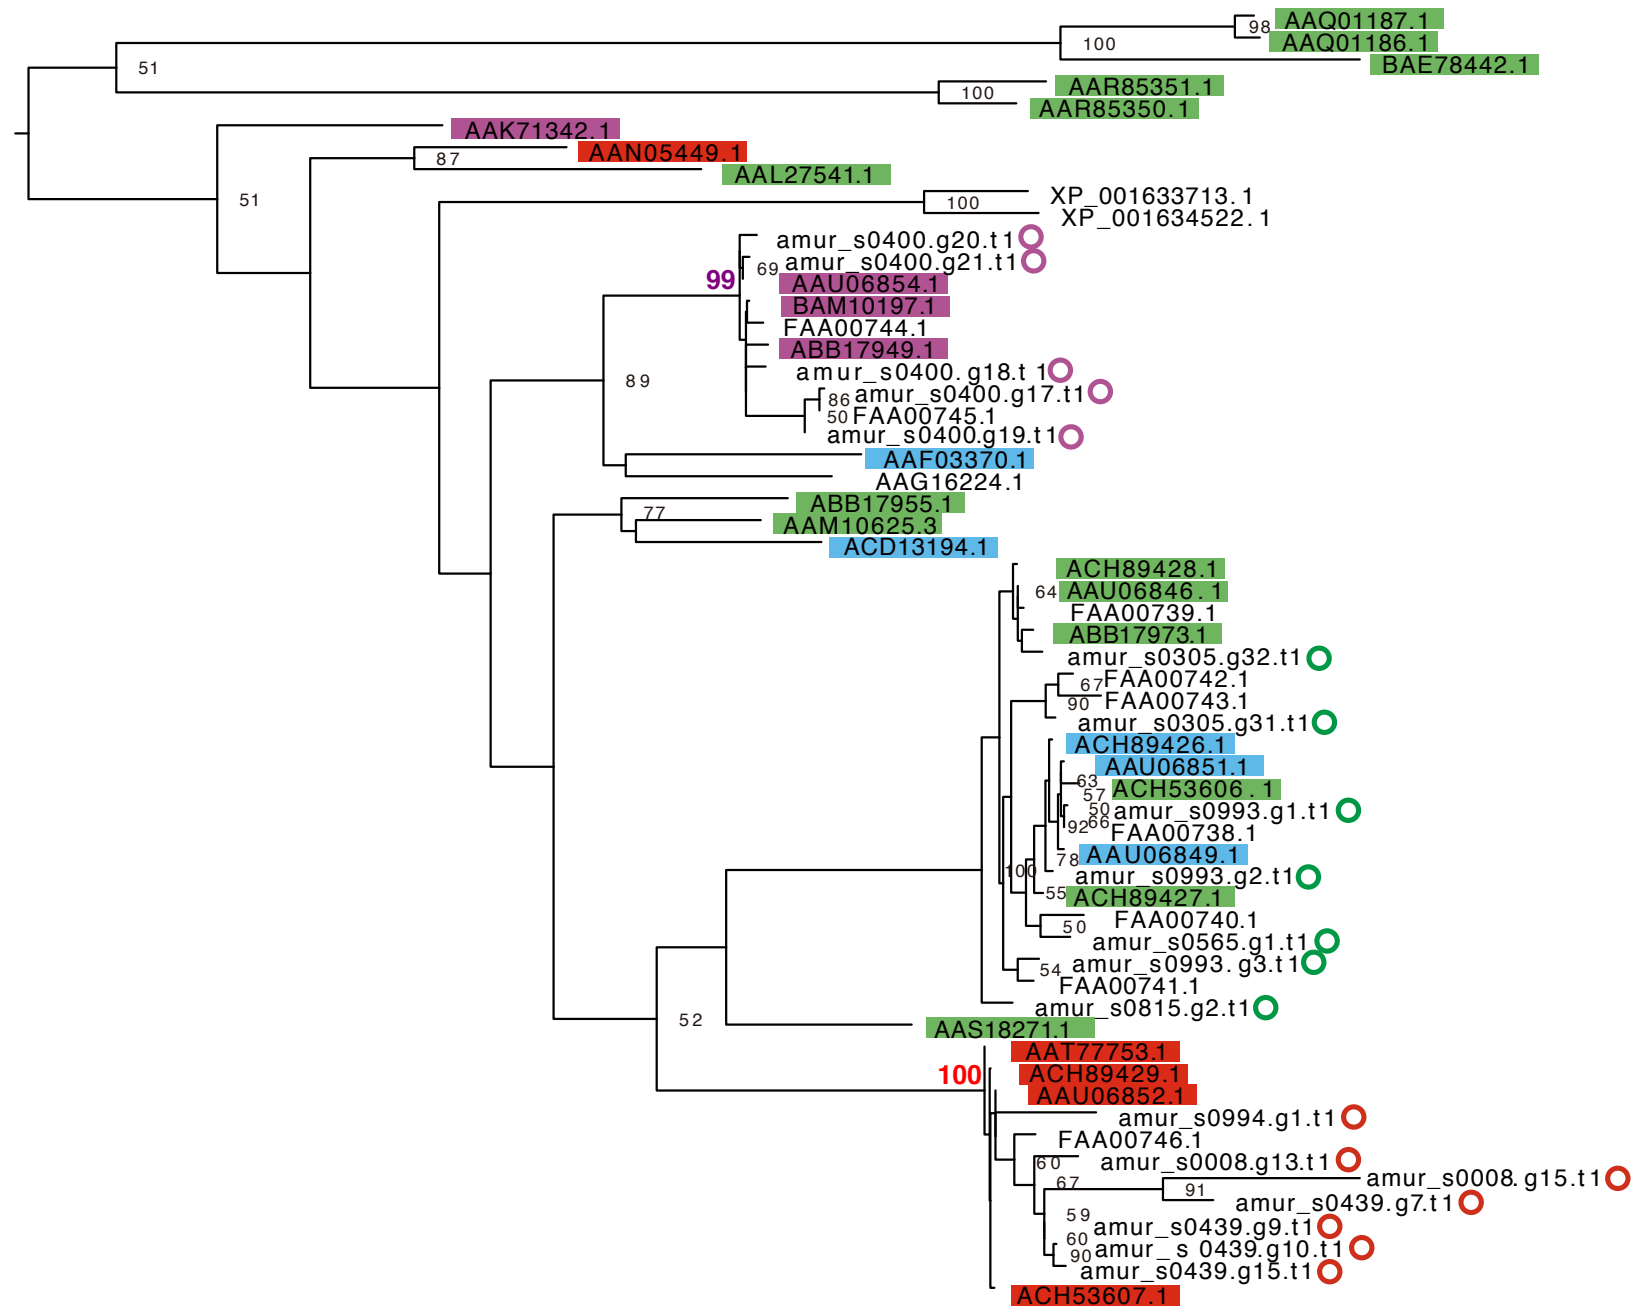

0.4

P

*A. selago*

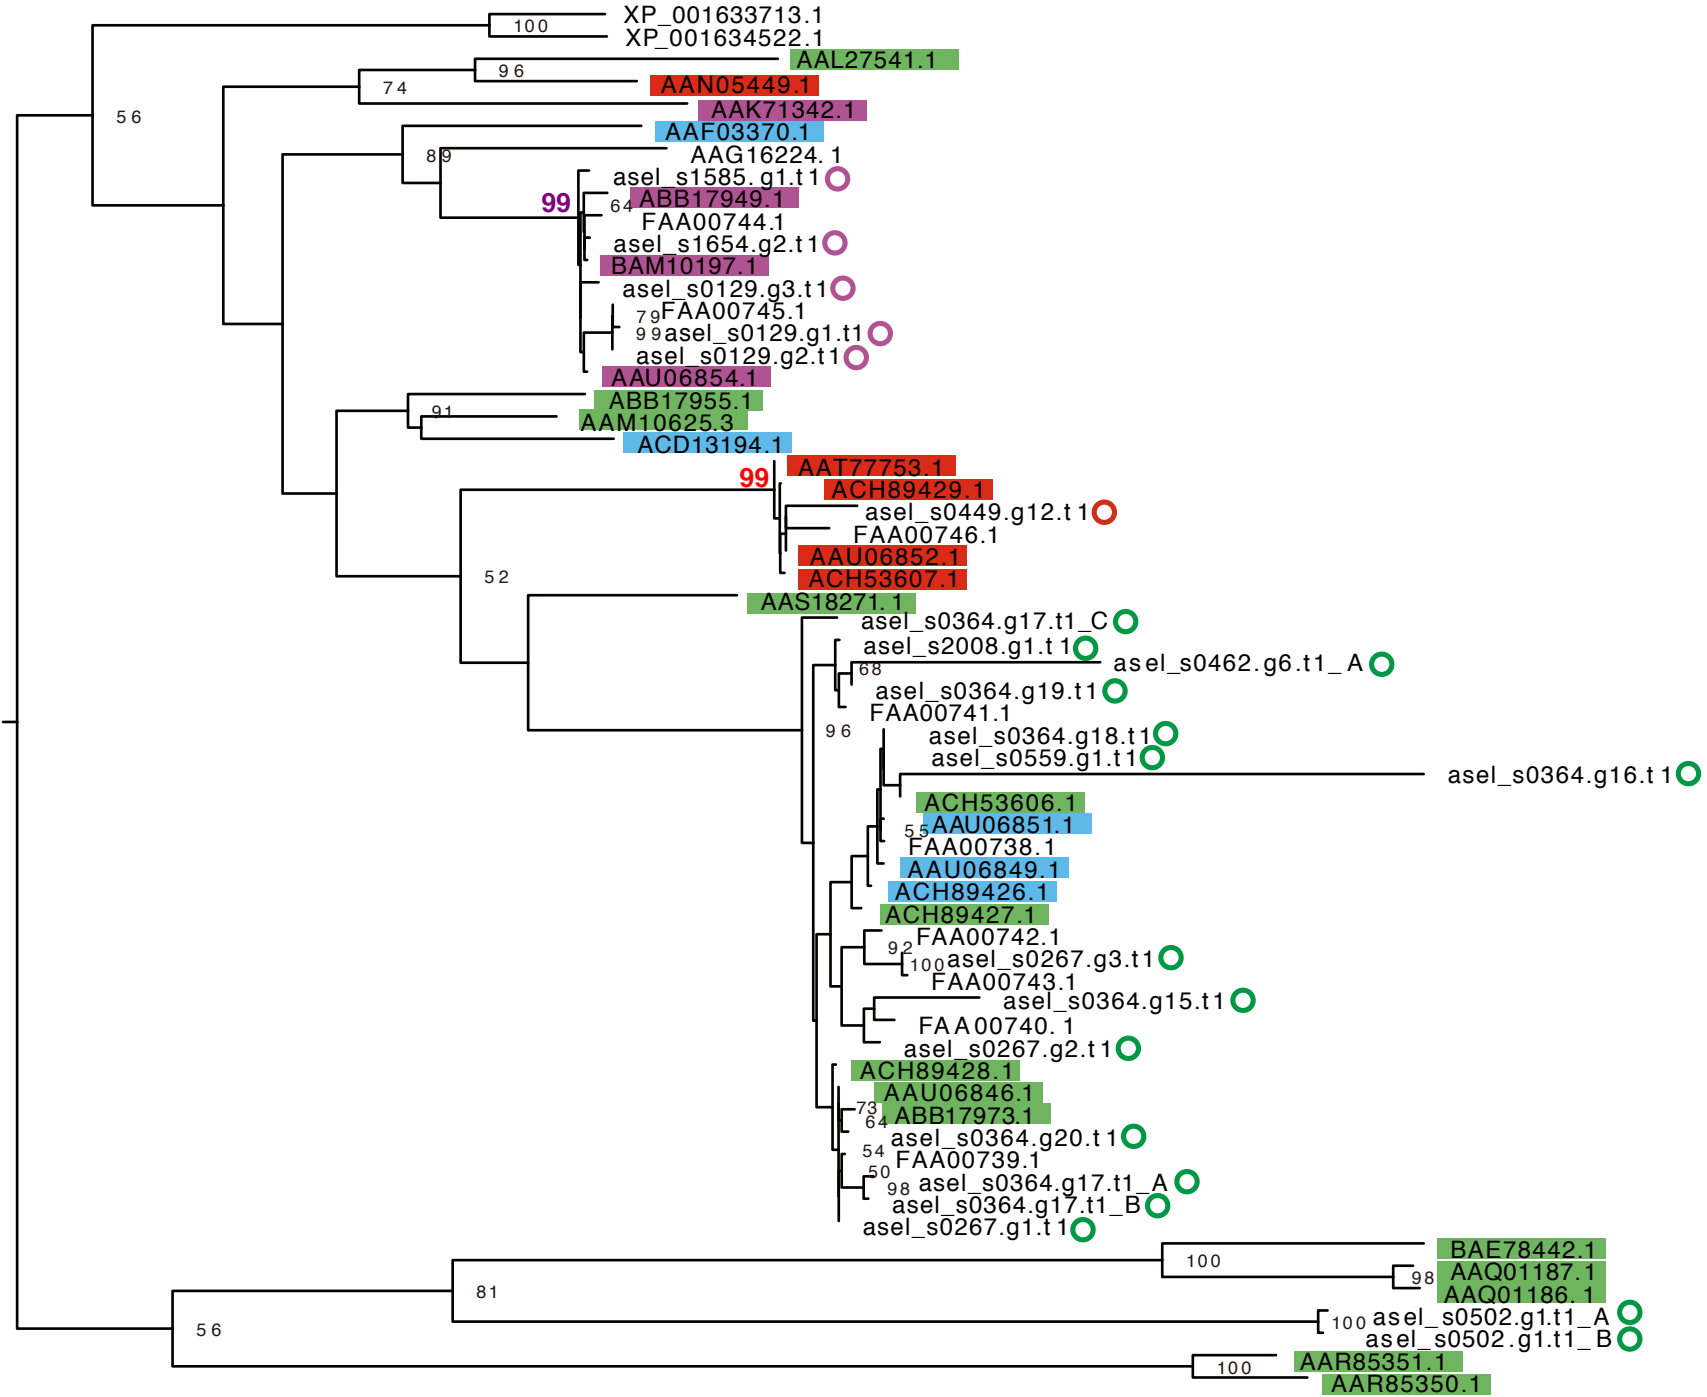

0.3



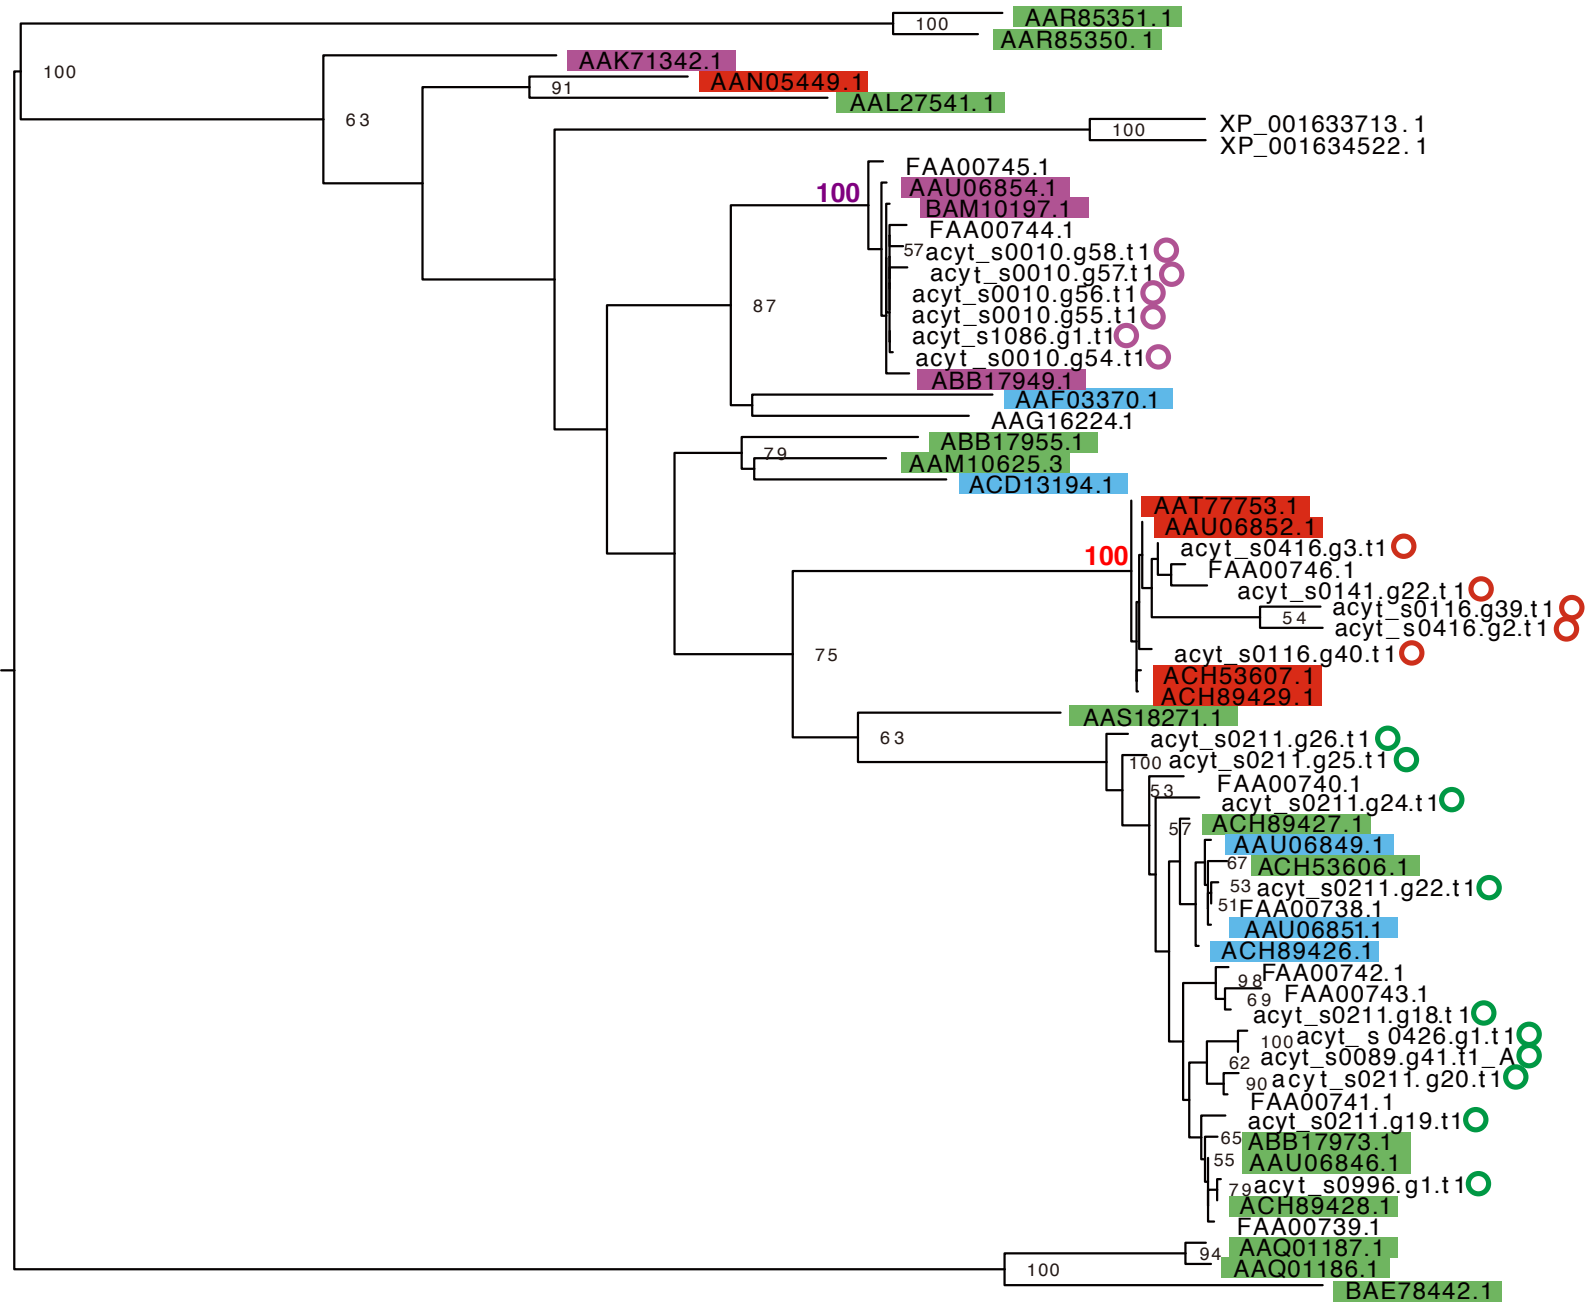

0.4

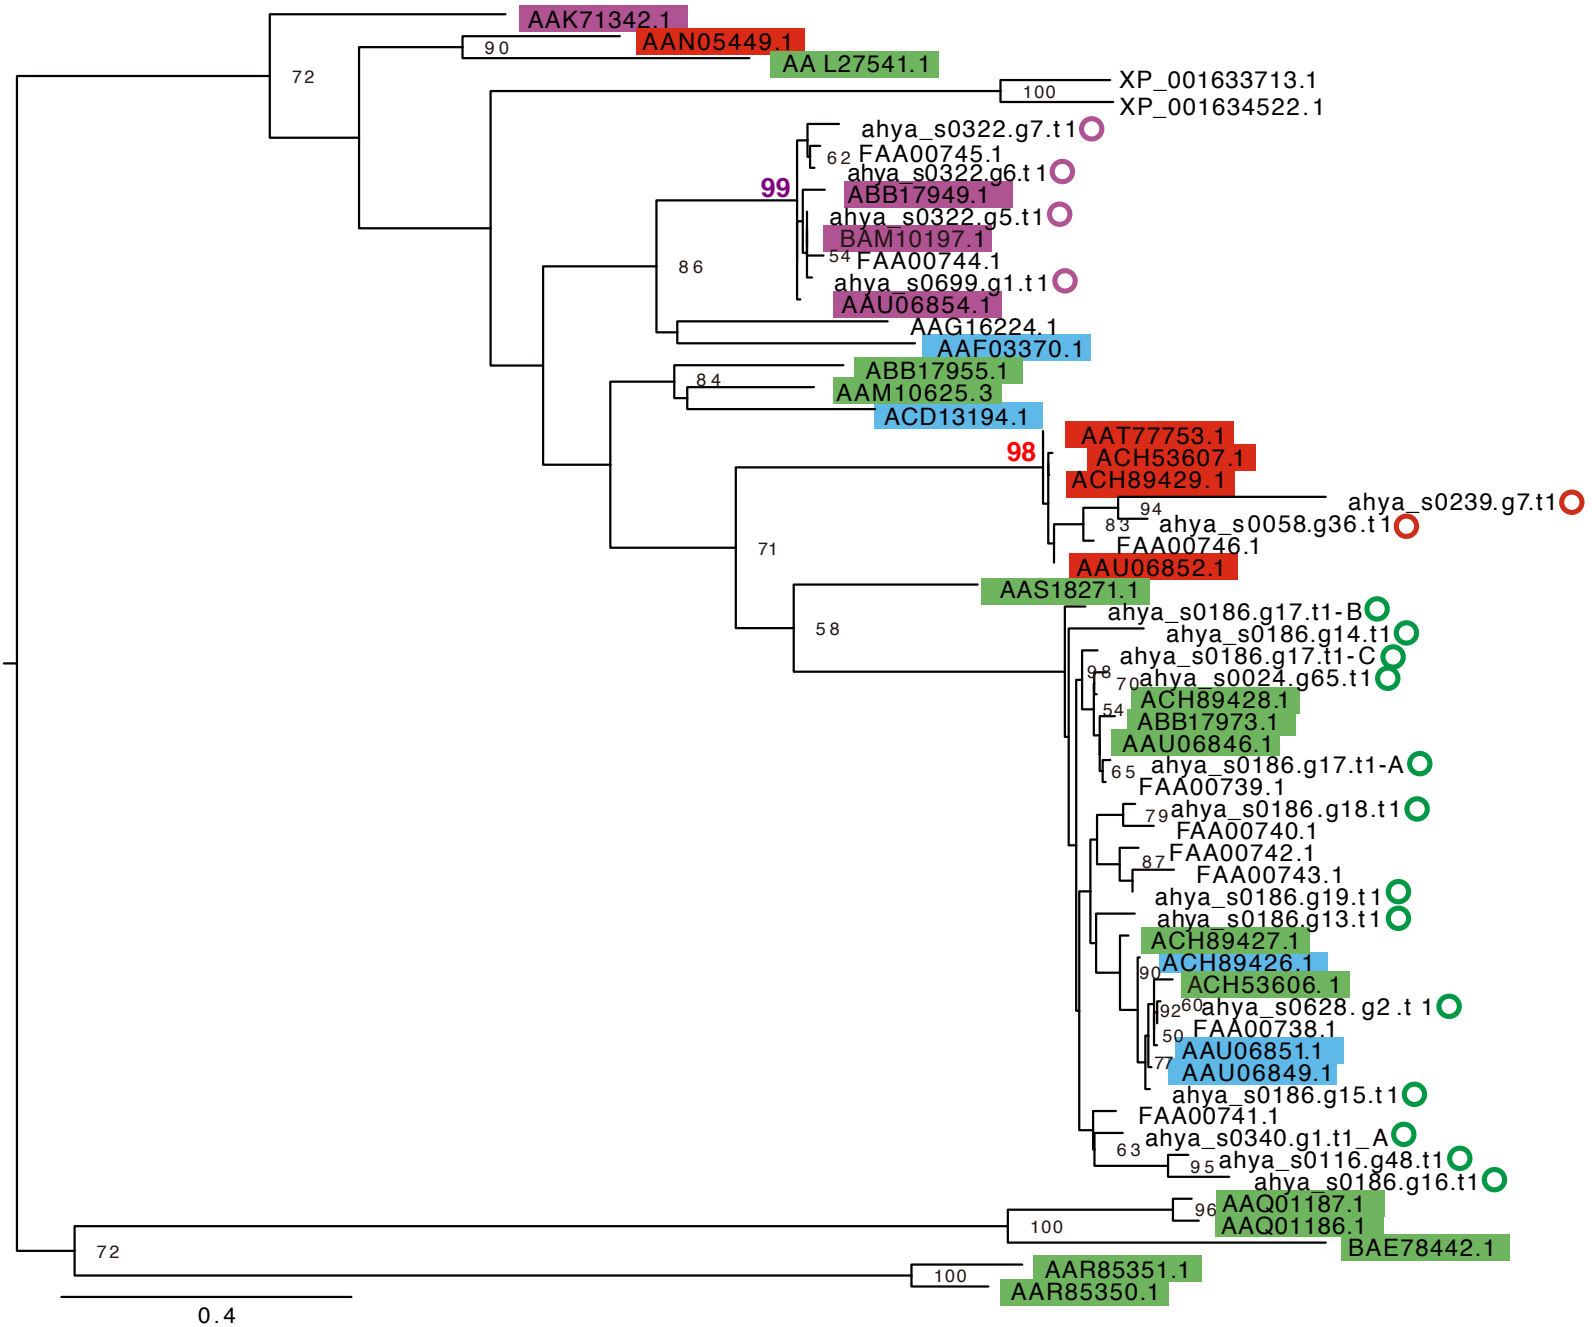

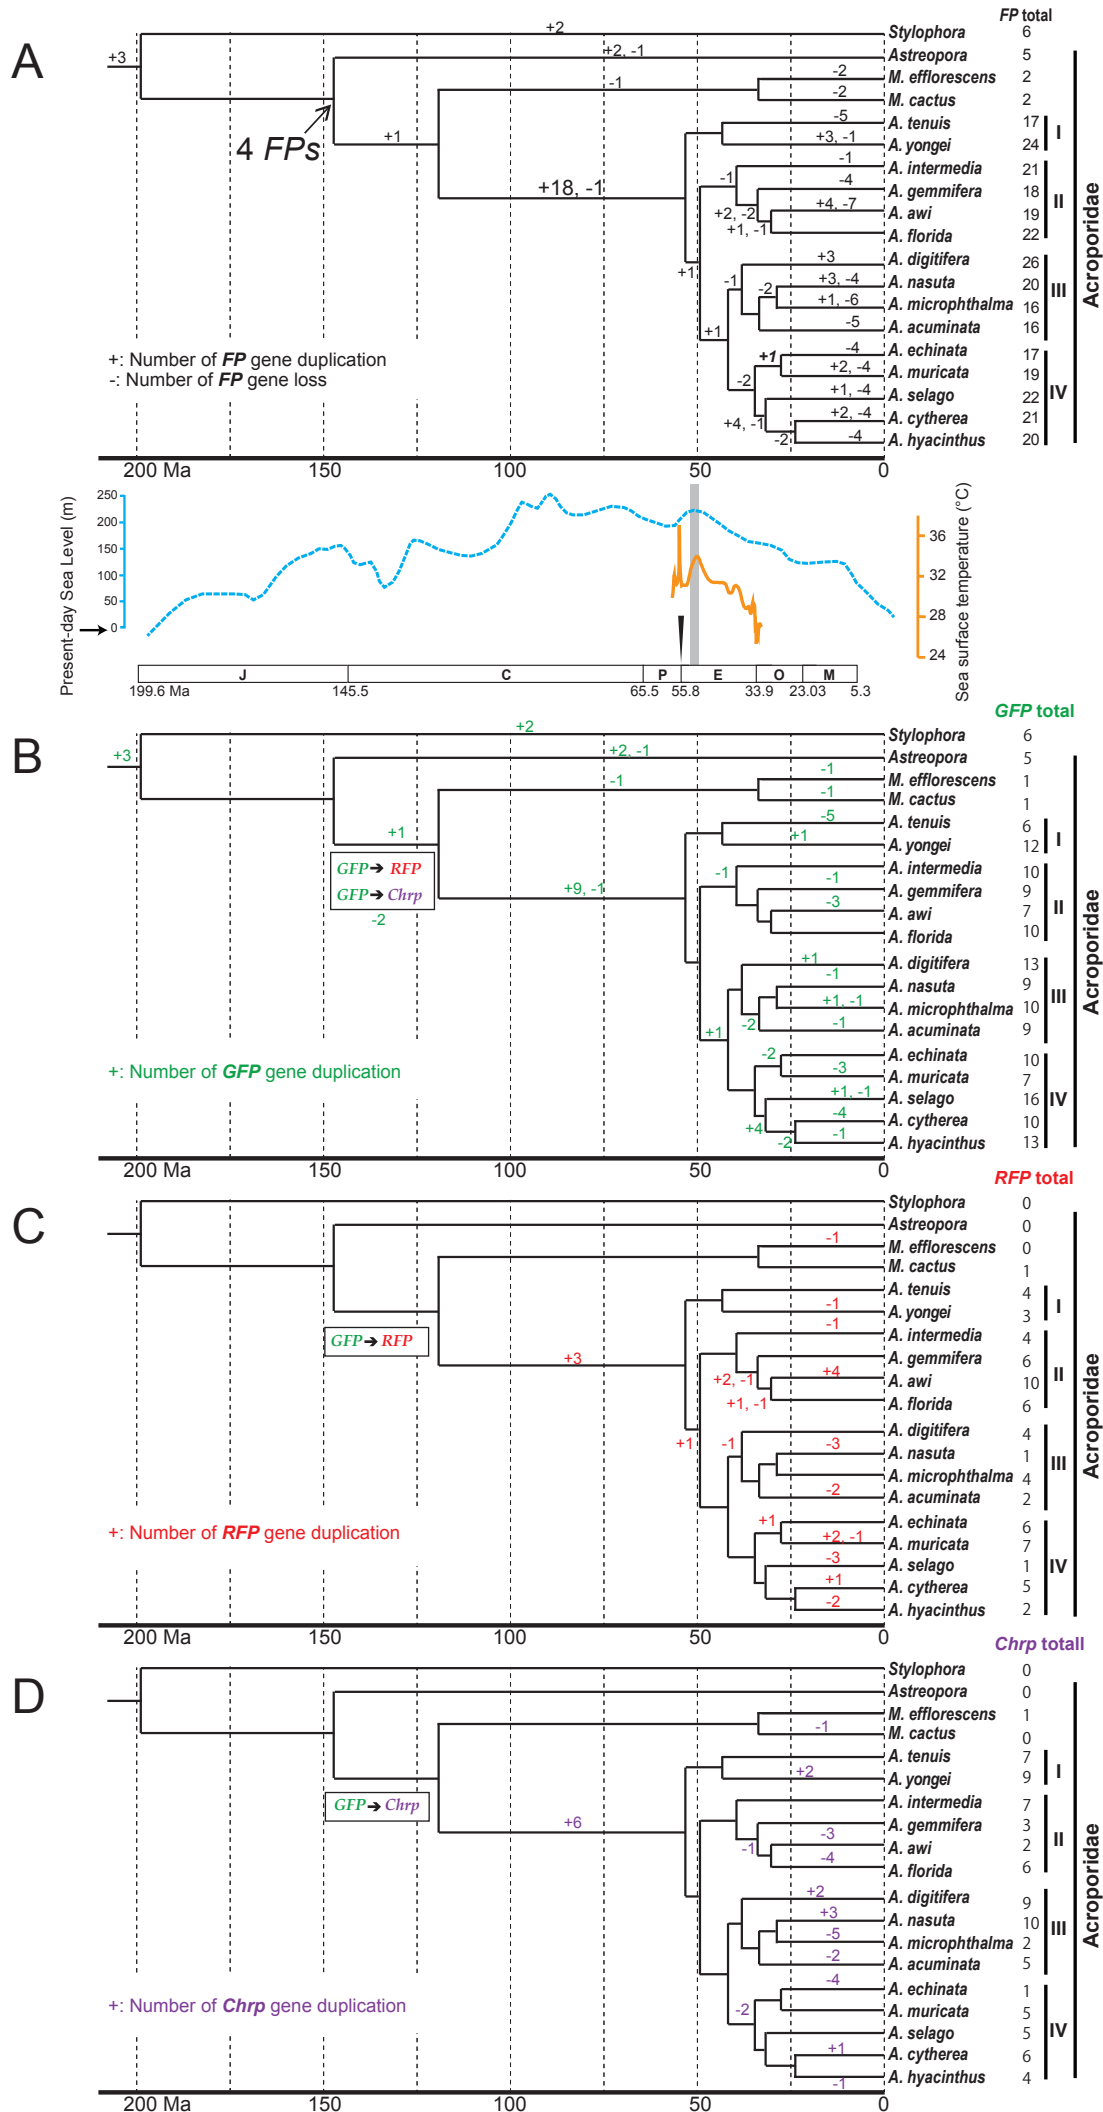

Figure S2. Expansions of fluorescent protein (FP) genes of the genus *Acropora* with estimated divergence times of acroporid corals by preliminary analysis. Numbers of genes duplicated (+) or lost (-) are indicated at branches. (A) FP gene duplications and losses. It is inferred that the common ancestor of Acroporidae had 5 FPs. Species trees with divergence time estimates, changes of sea level, and sea surface temperature are indicated [22]. Expected sea level changes are shown with a blue dotted line [55]. Estimated tropical sea surface temperature of the Eocene is indicated with an orange line [56]. The Paleocene–Eocene Thermal Maximum (PETM) is indicated with an arrowhead, and the Early Eocene Climatic Optimum (EECO) is highlighted in light grey. An approximate geological time scale is shown at the bottom. J: Jurassic Period, C: Cretaceous Period, P: Paleocene, E: Eocene, O: Oligocene, and M: Miocene. The history of FP duplications and losses are classified into those of GFP/CFPs (B), RFPs (C), and Chrps (D). Squares show that putative GFP evolved into RFP or Chrp.

A. GFP/CFP

chromophore  
three amino acids

Table of GFP/CFP sequences with columns for protein names (e.g., aten\_00297.g29.t1) and amino acid sequences. The sequences are color-coded by amino acid type. A central section is highlighted in blue and contains the text 'chromophore three amino acids'.

B. RFP

chromophore  
three amino acids

Table of RFP sequences with columns for protein names (e.g., mca\_00872.g3.t1) and amino acid sequences. The sequences are color-coded by amino acid type. A central section is highlighted in blue and contains the text 'chromophore three amino acids'.



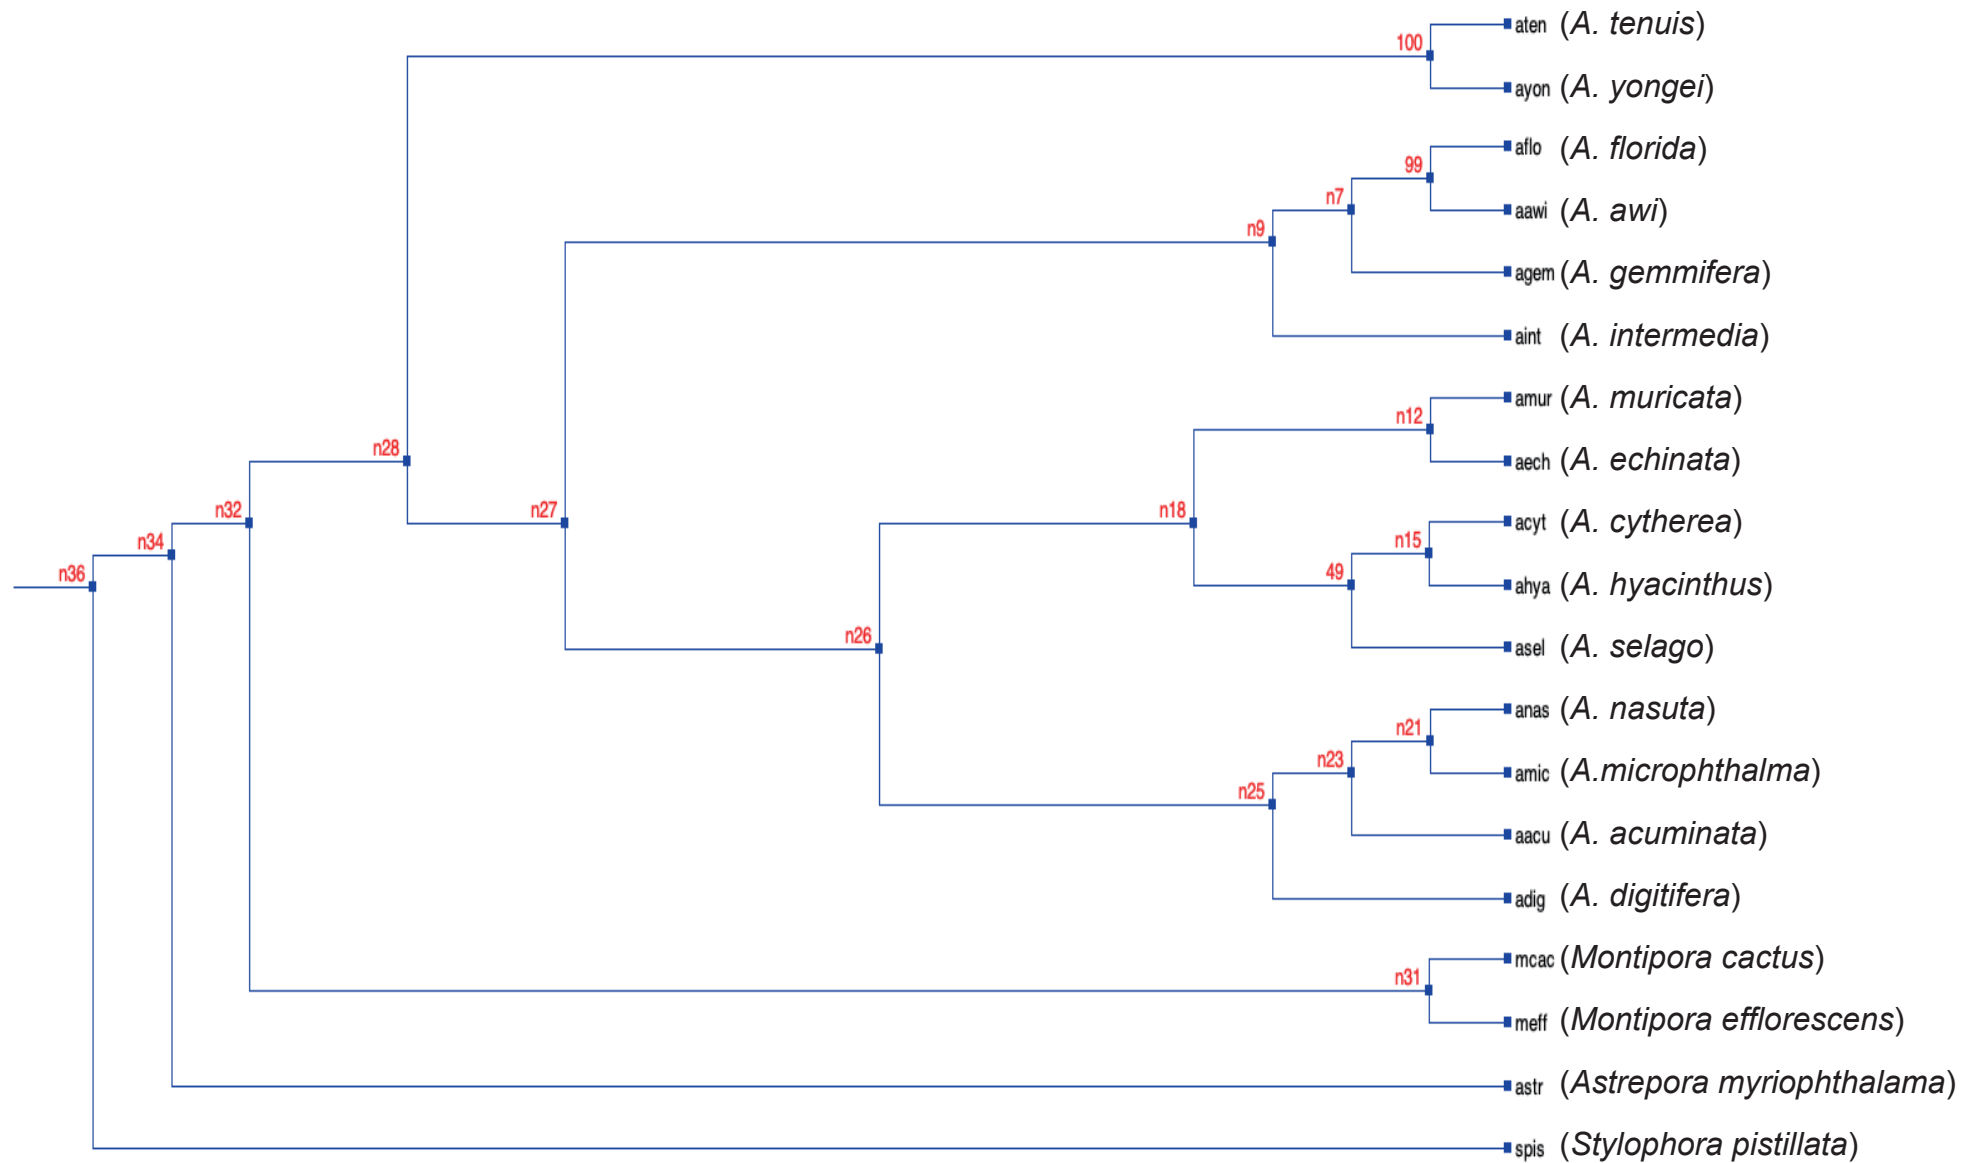

Figure S4. A phylogenetic tree showing node IDs from Notung output. Red letters show node IDs assigned by Notung, as also indicated in Table S3.

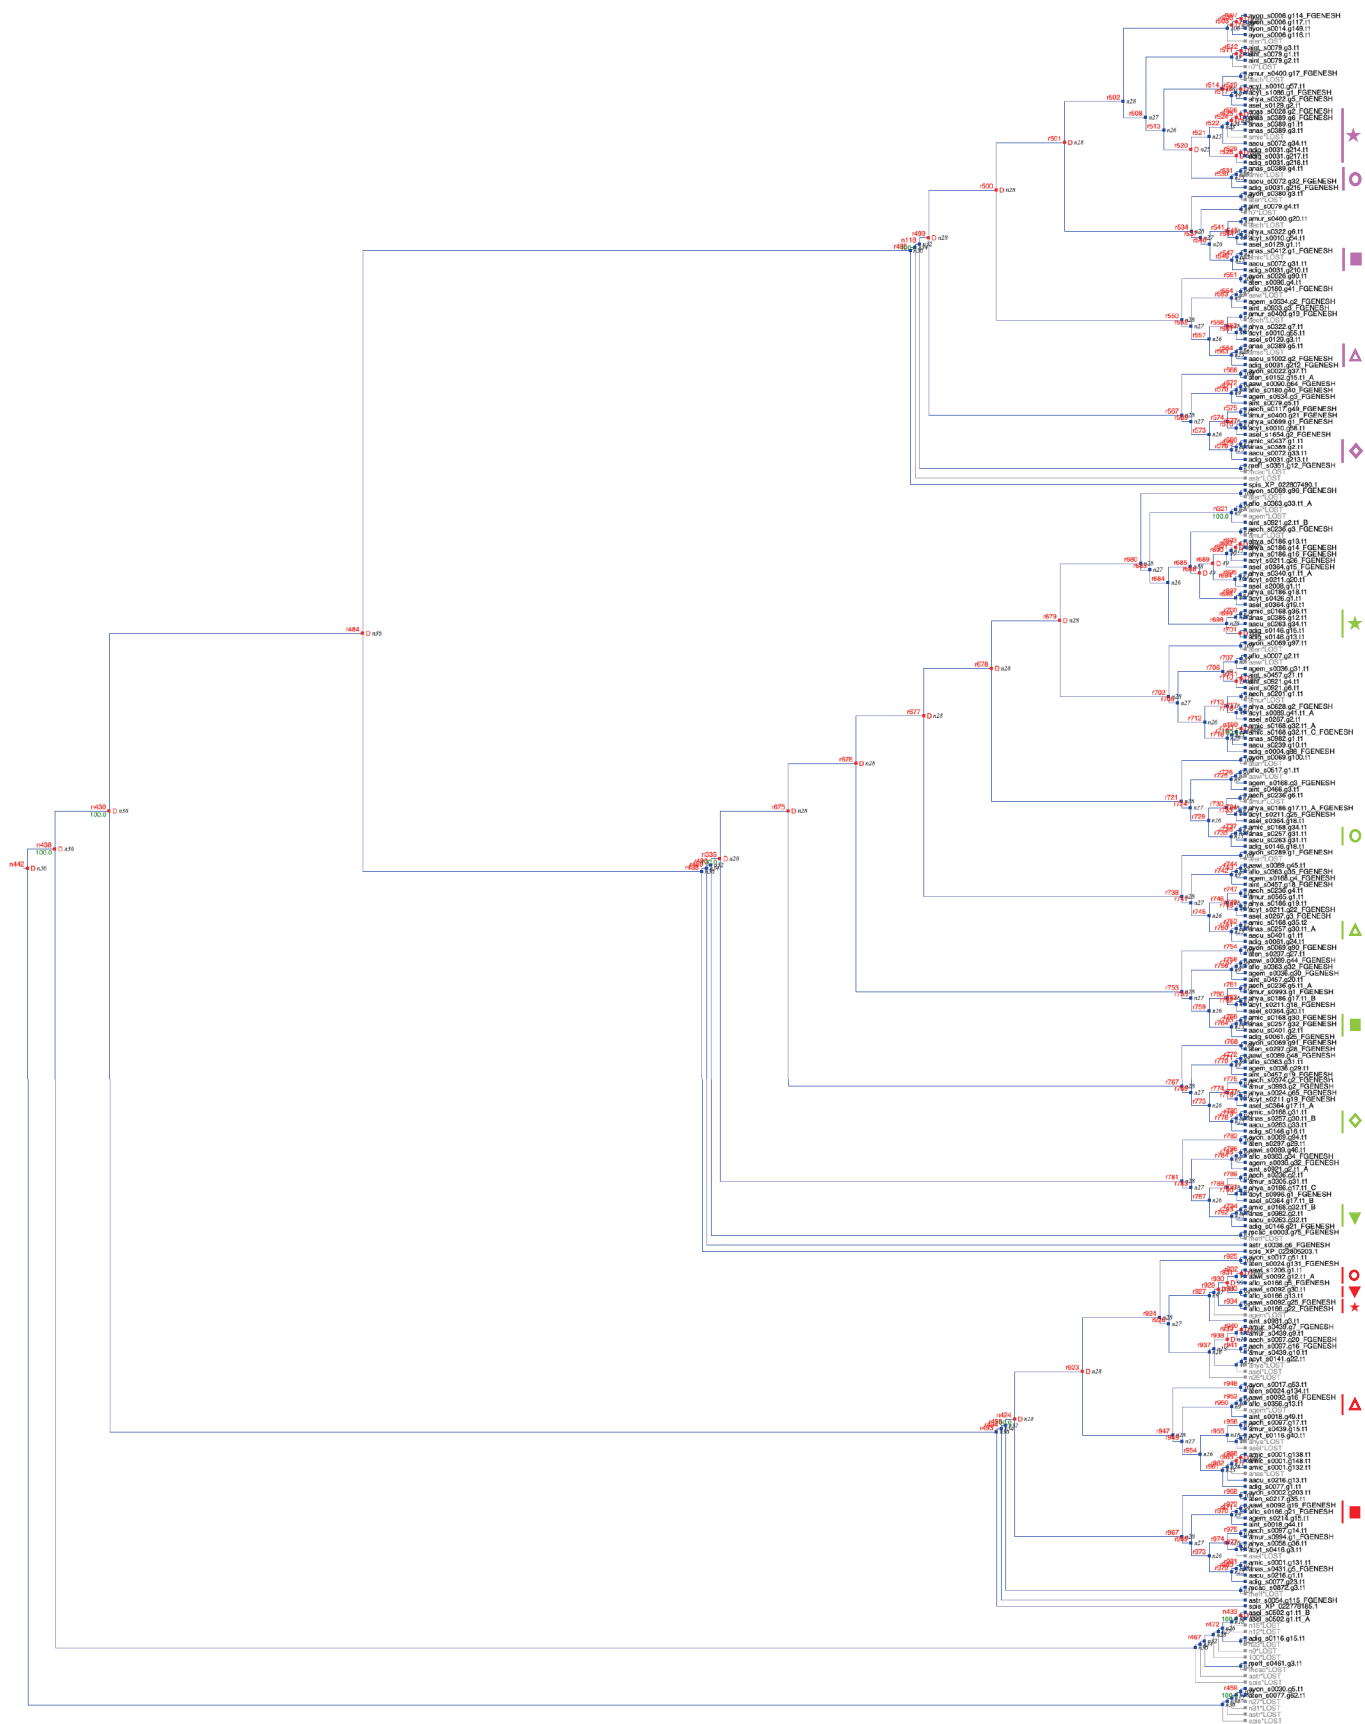

Figure S5. Ortholog prediction by molecular phylogenetic tree of the Acroporidae FPs. Estimated gene duplications are shown by red-letter “D” at internal node. Other red-letters are node IDs that are assigned by Notung software. Estimated gene loss is indicated by gray-letter “node ID and LOST” (see Figure S3 for node ID) at tip. High bootstrap values (100%) were shown in green-letter at internal node. GFP, RFP, and Chrp orthologous groups for *Acropora* species were shown with the marks (asterisk, circle, square, triangle, and lozenge) in green, pink, and purple, respectively. (See also Figure 3).

**Table S 1. FP genes for preliminary analysis**

| Coral species                   | GFP/CFP                                                                                                                                                                 |                                                                                                                                                                       | RFP                                                                                                       |                                                                                                      | Chromoprotein                                                                                                                    |                                                                                                  |
|---------------------------------|-------------------------------------------------------------------------------------------------------------------------------------------------------------------------|-----------------------------------------------------------------------------------------------------------------------------------------------------------------------|-----------------------------------------------------------------------------------------------------------|------------------------------------------------------------------------------------------------------|----------------------------------------------------------------------------------------------------------------------------------|--------------------------------------------------------------------------------------------------|
| <i>Astrepora myriophthalama</i> | astr_s0038.g6.t1*<br>astr_s0038.g10.t1_A<br>astr_s0054.g115.t1                                                                                                          | astr_s0111.g1.t1<br>astr_s0038.g11.t1_A                                                                                                                               |                                                                                                           |                                                                                                      |                                                                                                                                  |                                                                                                  |
| <i>Montipora efflorescens</i>   | mefl_s0461.g3.t1                                                                                                                                                        |                                                                                                                                                                       |                                                                                                           |                                                                                                      | mefl_s0351.g12.t1_A                                                                                                              |                                                                                                  |
| <i>Montipora cactus</i>         | mcac_s0003.g75.t1                                                                                                                                                       |                                                                                                                                                                       | mcac_s0872.g3.t1                                                                                          |                                                                                                      |                                                                                                                                  |                                                                                                  |
| <i>A. tenuis</i>                | aten_s0010.g7.t1<br>aten_s0077.g62.t1<br>aten_s0297.g27.t1<br>aten_s0297.g28.t1                                                                                         | aten_s0297.g29.t1<br>aten_s0366.g7.t1                                                                                                                                 | aten_s0024.g131.t1<br>aten_s0024.g134.t1                                                                  | aten_s0025.g63.t1<br>aten_s0217.g35.t1                                                               | aten_s0096.g1.t1<br>aten_s0096.g3.t1<br>aten_s0096.g4.t1<br>aten_s0152.g9.t1_A                                                   | aten_s0152.g11.t1<br>aten_s0152.g15.t1_A<br>aten_s0182.g24.t1                                    |
| <i>A. yongei</i>                | ayon_s0030.g5.t1<br>ayon_s0069.g90.t1<br>ayon_s0069.g91.t1<br>ayon_s0069.g93.t1<br>ayon_s0069.g94.t1<br>ayon_s0069.g95.t1                                               | ayon_s0069.g98.t1_A<br>ayon_s0069.g100.t1<br>ayon_s0289.g1.t1<br>ayon_s0289.g2.t1<br>ayon_s0069.g96.t1<br>ayon_s0069.g97.t1                                           | ayon_s0002.g203.t1<br>ayon_s0017.g51.t1<br>ayon_s0017.g53.t1                                              |                                                                                                      | ayon_s0006.g113.t1<br>ayon_s0006.g114.t1<br>ayon_s0006.g115.t1<br>ayon_s0006.g116.t1<br>ayon_s0006.g117.t1<br>ayon_s0014.g149.t1 | ayon_s0022.g37.t1<br>ayon_s0026.g90.t1<br>ayon_s0380.g3.t1                                       |
| <i>A. intermedia</i>            | aint_s0457.g18.t1<br>aint_s0457.g19.t1<br>aint_s0457.g20.t1<br>aint_s0457.g21.t<br>aint_s0466.g3.t1                                                                     | aint_s0921.g1.t1<br>aint_s0921.g2.t1_A<br>aint_s0921.g2.t1_B<br>aint_s0921.g4.t1<br>aint_s0921.g6.t1                                                                  | aint_s0018.g44.t1<br>aint_s0018.g49.t1<br>aint_s0981.g3.t1<br>aint_s2084.g1.t1                            |                                                                                                      | aint_s0079.g1.t1<br>aint_s0079.g2.t1<br>aint_s0079.g3.t1<br>aint_s0079.g4.t1<br>aint_s0079.g5.t1                                 | aint_s0933.g3.t1<br>aint_s0599.g1.t1                                                             |
| <i>A. gemmifera</i>             | agem_s0036.g28.t1<br>agem_s0036.g31.t1<br>agem_s0036.g32.t1<br>agem_s0168.g3.t1<br>agem_s0168.g4.t1                                                                     | agem_s0232.g2.t1<br>agem_s0927.g1.t1<br>agem_s0036.g29.t1<br>agem_s0036.g30.t1                                                                                        | agem_s0214.g4.t1<br>agem_s0214.g5.t1<br>agem_s0214.g12.t1<br>agem_s0214.g15.t1<br>agem_s0214.g24.t1       | agem_s0676.g1.t1                                                                                     | agem_s0534.g2.t1<br>agem_s0534.g3.t1<br>agem_s0837.g1.t1                                                                         |                                                                                                  |
| <i>A. avi</i>                   | aawi_s0089.g43.t1<br>aawi_s0089.g44.t1<br>aawi_s0089.g45.t1<br>aawi_s0089.g47.t1<br>aawi_s0089.g48.t1                                                                   | aawi_s0089.g49.t1<br>aawi_s0089.g46.t1                                                                                                                                | aawi_s0092.g11.t1<br>aawi_s0092.g12.t1_A<br>aawi_s0092.g16.t1<br>aawi_s0092.g17.t1<br>aawi_s0092.g18.t1_A | aawi_s0092.g19.t1<br>aawi_s0092.g25.t1<br>aawi_s0092.g26.t1<br>aawi_s0092.g30.t1<br>aawi_s1206.g1.t1 | aawi_s0090.g64.t1<br>aawi_s0090.g65.t1                                                                                           |                                                                                                  |
| <i>A. florida</i>               | aflo_s0007.g2.t1<br>aflo_s0363.g31.t1<br>aflo_s0363.g32.t1<br>aflo_s0363.g33.t1_A<br>aflo_s0363.g33.t1_A                                                                | aflo_s0363.g34.t1<br>aflo_s0363.g35.t1<br>aflo_s0363.g36.t1<br>aflo_s0517.g1.t1<br>aflo_s1975.g1.t1                                                                   | aflo_s0166.g5.t1<br>aflo_s0166.g13.t1<br>aflo_s0166.g21.t1<br>aflo_s0166.g22.t1<br>aflo_s0356.g13.t1      | aflo_s0356.g14.t1                                                                                    | aflo_s0012.g118.t1<br>aflo_s0012.g119.t1<br>aflo_s0180.g39.t1<br>aflo_s0180.g40.t1<br>aflo_s0180.g41.t1                          | aflo_s0180.g42.t1                                                                                |
| <i>A. digitifera</i>            | adig_s0004.g88.t1<br>adig_s0061.g24.t1<br>adig_s0061.g25.t1<br>adig_s0116.g15.t1<br>adig_s0146.g13.t1<br>adig_s0146.g14.t1<br>adig_s0146.g15.t1                         | adig_s0146.g16.t1<br>adig_s0146.g17.t1<br>adig_s0146.g18.t1<br>adig_s0146.g19.t1<br>adig_s0146.g20.t1<br>adig_s0146.g21.t1                                            | adig_s0077.g1.t1<br>adig_s0077.g2.t1<br>adig_s0077.g3.t1<br>adig_s0077.g23.t1                             |                                                                                                      | adig_s0031.g210.t1<br>adig_s0031.g211.t1<br>adig_s0031.g212.t1<br>adig_s0031.g213.t1<br>adig_s0031.g214.t1<br>adig_s0031.g215.t1 | adig_s0031.g216.t1<br>adig_s0031.g217.t1<br>adig_s0031.g218.t1                                   |
| <i>A. nasuta</i>                | anas_s0191.g1.t1<br>anas_s0191.g2.t1<br>anas_s0257.g30.t1_A<br>anas_s0257.g30.t1_B<br>anas_s0257.g31.t1                                                                 | anas_s0385.g12.t1<br>anas_s0982.g1.t1<br>anas_s0982.g2.t1<br>anas_s0257.g32.t1<br>anas_s0982.g2.t1*                                                                   | anas_s0431.g5.t1                                                                                          |                                                                                                      | anas_s0028.g1.t1<br>anas_s0028.g2.t1<br>anas_s0028.g3.t1<br>anas_s0389.g1.t1<br>anas_s0389.g2.t1<br>anas_s0412.g1.t1             | anas_s0389.g3.t1<br>anas_s0389.g4.t1<br>anas_s0389.g5.t1<br>anas_s0389.g6.t1<br>anas_s0412.g1.t1 |
| <i>A. microphthalma</i>         | amic_s0168.g30.t1<br>amic_s0168.g31.t1<br>amic_s0168.g32.t1_A<br>amic_s0168.g32.t1_B<br>amic_s0168.g32.t1_C                                                             | amic_s0168.g33.t1<br>amic_s0168.g35.t1<br>amic_s0168.g36.t1<br>amic_s3224.g1.t1<br>amic_s0168.g34.t1                                                                  | amic_s0001.g131.t1<br>amic_s0001.g132.t1<br>amic_s0001.g138.t1<br>amic_s0001.g148.t1                      |                                                                                                      | amic_s0437.g1.t1<br>amic_s0437.g2.t1                                                                                             |                                                                                                  |
| <i>A. acuminata</i>             | aacu_s0239.g9.t1<br>aacu_s0239.g10.t1<br>aacu_s0263.g31.t1<br>aacu_s0263.g32.t1<br>aacu_s0263.g33.t1                                                                    | aacu_s0263.g34.t1<br>aacu_s0401.g2.t1<br>aacu_s0401.g3.t1_A<br>aacu_s0401.g1.t1                                                                                       | aacu_s0216.g1.t1<br>aacu_s0216.g13.t1                                                                     |                                                                                                      | aacu_s0072.g31.t1<br>aacu_s0072.g32.t1<br>aacu_s0072.g33.t1<br>aacu_s0072.g34.t1                                                 | aacu_s1002.g2.t1                                                                                 |
| <i>A. echinata</i>              | aech_s0054.g127.t1<br>aech_s0201.g1.t1<br>aech_s0201.g2.t1<br>aech_s0236.g1.t1<br>aech_s0236.g2.t1                                                                      | aech_s0236.g3.t1<br>aech_s0236.g5.t1_A<br>aech_s0236.g6.t1<br>aech_s0374.g2.t1<br>aech_s0236.g4.t1                                                                    | aech_s0086.g75.t1<br>aech_s0097.g14.t1<br>aech_s0097.g16.t1<br>aech_s0097.g17.t1<br>aech_s0097.g20.t1     | aech_s0359.g4.t1_A                                                                                   | aech_s0117.g49.t1                                                                                                                |                                                                                                  |
| <i>A. muricata</i>              | amur_s0305.g31.t1<br>amur_s0305.g32.t1<br>amur_s0565.g1.t1<br>amur_s0815.g2.t1                                                                                          | amur_s0993.g3.t1<br>amur_s0993.g1.t1<br>amur_s0993.g2.t1                                                                                                              | amur_s0008.g13.t1<br>amur_s0008.g15.t1<br>amur_s0994.g1.t1<br>amur_s0439.g7.t1                            | amur_s0439.g9.t1<br>amur_s0439.g10.t1<br>amur_s0439.g15.t1                                           | amur_s0400.g17.t1<br>amur_s0400.g18.t1<br>amur_s0400.g19.t1<br>amur_s0400.g20.t1                                                 | amur_s0400.g21.t1                                                                                |
| <i>A. selogo</i>                | asel_s0267.g1.t1<br>asel_s0267.g2.t1<br>asel_s0267.g3.t1<br>asel_s0364.g15.t1<br>asel_s0364.g16.t1<br>asel_s0364.g17.t1_A<br>asel_s0364.g17.t1_A<br>asel_s0364.g17.t1_B | asel_s0364.g19.t1<br>asel_s0364.g20.t1<br>asel_s0462.g6.t1_A<br>asel_s0502.g1.t1_A<br>asel_s0502.g1.t1_B<br>asel_s2008.g1.t1<br>asel_s0364.g18.t1<br>asel_s0559.g1.t1 | asel_s0449.g12.t1                                                                                         |                                                                                                      | asel_s0129.g1.t1<br>asel_s0129.g2.t1<br>asel_s0129.g3.t1<br>asel_s1585.g1.t1<br>asel_s1654.g2.t1                                 |                                                                                                  |
| <i>A. cytherea</i>              | acyt_s0089.g41.t1_A<br>acyt_s0211.g18.t1<br>acyt_s0211.g19.t1<br>acyt_s0211.g20.t1<br>acyt_s0211.g22.t1                                                                 | acyt_s0211.g24.t1<br>acyt_s0211.g25.t1<br>acyt_s0211.g26.t1<br>acyt_s0426.g1.t1<br>acyt_s0996.g1.t1                                                                   | acyt_s0116.g39.t1<br>acyt_s0116.g40.t1<br>acyt_s0141.g22.t1<br>acyt_s0416.g2.t1<br>acyt_s0416.g3.t1       |                                                                                                      | acyt_s0010.g54.t1<br>acyt_s0010.g55.t1<br>acyt_s0010.g56.t1<br>acyt_s0010.g57.t1<br>acyt_s0010.g58.t1                            | acyt_s1086.g1.t1                                                                                 |
| <i>A. hyacinthus</i>            | ahya_s0024.g65.t1<br>ahya_s0116.g48.t1<br>ahya_s0186.g13.t1<br>ahya_s0186.g14.t1<br>ahya_s0186.g16.t1<br>ahya_s0186.g17.t1_A<br>ahya_s0186.g17.t1_B                     | ahya_s0186.g17.t1_C<br>ahya_s0186.g18.t1<br>ahya_s0186.g19.t1<br>ahya_s0340.g1.t1_A<br>ahya_s0186.g15.t1<br>ahya_s0628.g2.t1                                          | ahya_s0058.g36.t1<br>ahya_s0239.g7.t1                                                                     |                                                                                                      | ahya_s0322.g5.t1<br>ahya_s0322.g6.t1<br>ahya_s0322.g7.t1<br>ahya_s0699.g1.t1                                                     |                                                                                                  |

\*The number following "s" in gene model ID indicates a scaffold number that the gene is located on. For example, "astr\_s0038.g6.t1" is mapped on scaffold 38.



**Table S 2. Analyzed FP genes**

| Coral species                   | GFP/CFP                     |                             | RFP                     |                        | Chromoprotein           |                        |
|---------------------------------|-----------------------------|-----------------------------|-------------------------|------------------------|-------------------------|------------------------|
| <i>Astrepورا myriophthalama</i> | astr_s0038.g6_FGENESH       | astr_s0054.g115_FGENESH     |                         |                        |                         |                        |
| <i>Montipora efflorescens</i>   | meff_s0461.g3.t1            |                             |                         |                        | meff_s0351.g12_FGENESH  |                        |
| <i>Montipora cactus</i>         | mcac_s0003.g75_FGENESH      |                             | mcac_s0872.g3.t1        |                        |                         |                        |
| <i>A. tenuis</i>                | aten_s0077.g62.t1           | aten_s0297.g28_FGENESH      | aten_s0024.g131_FGENESH | aten_s0217.g35.t1      | aten_s0096.g4.t1        |                        |
|                                 | aten_s0297.g27.t1           | aten_s0297.g29.t1           | aten_s0024.g134.t1      |                        | aten_s0152.g15.t1_A     |                        |
| <i>A. yongei</i>                | ayon_s0030.g5.t1            | ayon_s0069.g96_FGENESH      | ayon_s0002.g203.t1      |                        | ayon_s0006.g114_FGENESH | ayon_s0022.g37.t1      |
|                                 | ayon_s0069.g90_FGENESH      | ayon_s0069.g97.t1           | ayon_s0017.g51.t1       |                        | ayon_s0006.g116.t1      | ayon_s0026.g90.t1      |
|                                 | ayon_s0069.g91_FGENESH      | ayon_s0069.g100.t1          | ayon_s0017.g53.t1       |                        | ayon_s0006.g117.t1      | ayon_s0380.g3.t1       |
|                                 | ayon_s0069.g94.t1           | ayon_s0289.g1_FGENESH       |                         |                        | ayon_s0014.g149.t1      |                        |
| <i>A. intermedia</i>            | aint_s0457.g18_FGENESH      | aint_s0921.g2.t1_A          | aint_s0018.g44.t1       |                        | aint_s0079.g1.t1        | aint_s0933.g3_FGENESH  |
|                                 | aint_s0457.g19_FGENESH      | aint_s0921.g2.t1_B          | aint_s0018.g49.t1       |                        | aint_s0079.g2.t1        |                        |
|                                 | aint_s0457.g20.t1           | aint_s0921.g4.t1            | aint_s0981.g3.t1        |                        | aint_s0079.g3.t1        |                        |
|                                 | aint_s0457.g21.t1           | aint_s0921.g6.t1            |                         |                        | aint_s0079.g4.t1        |                        |
|                                 | aint_s0466.g3.t1            |                             |                         |                        | aint_s0079.g5.t1        |                        |
| <i>A. gemmifera</i>             | agem_s0036.g29.t1           | agem_s0036.g31.t1           | agem_s0214.g15.t1       |                        | agem_s0534.g2_FGENESH   |                        |
|                                 | agem_s0036.g30_FGENESH      | agem_s0168.g3_FGENESH       |                         |                        | agem_s0534.g3_FGENESH   |                        |
|                                 | agem_s0036.g32_FGENESH      | agem_s0168.g4_FGENESH       |                         |                        |                         |                        |
| <i>A. awi</i>                   | aawi_s0089.g44_FGENESH      | aawi_s0089.g48_FGENESH      | aawi_s0092.g12.t1_A     | aawi_s0092.g25_FGENESH | aawi_s0090.g64_FGENESH  |                        |
|                                 | aawi_s0089.g45.t1           |                             | aawi_s0092.g16_FGENESH  | aawi_s0092.g30.t1      |                         |                        |
|                                 | aawi_s0089.g46.t1           |                             | aawi_s0092.g19_FGENESH  | aawi_s1206.g1.t1       |                         |                        |
| <i>A. florida</i>               | aflo_s0007.g2.t1            | aflo_s0363.g34_FGENESH      | aflo_s0166.g5_FGENESH   | aflo_s0356.g13.t1      | aflo_s0180.g40_FGENESH  |                        |
|                                 | aflo_s0363.g31.t1           | aflo_s0363.g35_FGENESH      | aflo_s0166.g13.t1       |                        | aflo_s0180.g41_FGENESH  |                        |
|                                 | aflo_s0363.g32_FGENESH      | aflo_s0517.g1.t1            | aflo_s0166.g21_FGENESH  |                        |                         |                        |
|                                 | aflo_s0363.g33.t1_A         |                             | anas_s0431.g5_FGENESH   |                        |                         |                        |
| <i>A. digitifera</i>            | adig_s0004.g88_FGENESH      | adig_s0146.g15.t1           | adig_s0077.g1.t1        |                        | adig_s0031.g210.t1      | adig_s0031.g217.t1     |
|                                 | adig_s0061.g24.t1           | adig_s0146.g16.t1           | adig_s0077.g23.t1       |                        | adig_s0031.g212_FGENESH | adig_s0031.g218.t1     |
|                                 | adig_s0061.g25_FGENESH      | adig_s0146.g18.t1           |                         |                        | adig_s0031.g213.t1      |                        |
|                                 | adig_s0116.g15.t1           | adig_s0146.g21_FGENESH      |                         |                        | adig_s0031.g214.t1      |                        |
|                                 | adig_s0146.g13.t1           |                             |                         |                        | adig_s0031.g215_FGENESH |                        |
| <i>A. nasuta</i>                | anas_s0257.g30.t1_A         | aacu_s0263.g32.t1           | anas_s0431.g5_FGENESH   |                        | anas_s0028.g2_FGENESH   | anas_s0389.g4.t1       |
|                                 | anas_s0257.g30.t1_B         | anas_s0385.g12.t1           |                         |                        | anas_s0389.g1.t1        | anas_s0389.g5.t1       |
|                                 | anas_s0257.g31.t1           | anas_s0982.g1.t1            |                         |                        | anas_s0389.g2.t1        | anas_s0389.g6_FGENESH  |
|                                 | anas_s0257.g32_FGENESH      |                             |                         |                        | anas_s0389.g3.t1        | anas_s0412.g1_FGENESH  |
| <i>A. microphthalma</i>         | amic_s0168.g30_FGENESH      | amic_s0168.g32.t1_C_FGENESH | amic_s0001.g131.t1      |                        | amic_s0437.g1.t1        |                        |
|                                 | amic_s0168.g31.t1           | amic_s0168.g34.t1           | amic_s0001.g132.t1      |                        |                         |                        |
|                                 | amic_s0168.g32.t1_A         | amic_s0168.g35.t2           | amic_s0001.g138.t1      |                        |                         |                        |
|                                 | amic_s0168.g32.t1_B         | amic_s0168.g36.t1           | amic_s0001.g148.t1      |                        |                         |                        |
| <i>A. acuminata</i>             | aacu_s0239.g10.t1           | aacu_s0263.g34.t1           | aacu_s0216.g1.t1        |                        | aacu_s0072.g31.t1       | aacu_s1002.g2_FGENESH  |
|                                 | aacu_s0263.g31.t1           | aacu_s0401.g1.t1            | aacu_s0216.g13.t1       |                        | aacu_s0072.g32_FGENESH  |                        |
|                                 | aacu_s0263.g32.t1           | aacu_s0401.g2.t1            |                         |                        | aacu_s0072.g33.t1       |                        |
|                                 | aacu_s0263.g33.t1           |                             |                         |                        | aacu_s0072.g34.t1       |                        |
| <i>A. echinata</i>              | aech_s0201.g1.t1            | aech_s0236.g5.t1_A          | aech_s0097.g14.t1       |                        | aech_s0117.g49_FGENESH  |                        |
|                                 | aech_s0236.g2.t1            | aech_s0236.g6.t1            | aech_s0097.g17.t1       |                        |                         |                        |
|                                 | aech_s0236.g3_FGENESH       | aech_s0374.g2_FGENESH       | aech_s0097.g16_FGENESH  |                        |                         |                        |
|                                 | aech_s0236.g4.t1            |                             | aech_s0097.g20_FGENESH  |                        |                         |                        |
| <i>A. muricata</i>              | amur_s0305.g31.t1           | amur_s0993.g2_FGENESH       | amur_s0439.g7_FGENESH   | amur_s0439.g15.t1      | amur_s0400.g17_FGENESH  | amur_s0400.g21_FGENESH |
|                                 | amur_s0565.g1.t1            |                             | amur_s0439.g9.t1        | amur_s0994.g1_FGENESH  | amur_s0400.g19_FGENESH  |                        |
|                                 | amur_s0993.g1_FGENESH       |                             | amur_s0439.g10.t1       |                        | amur_s0400.g20.t1       |                        |
| <i>A. selago</i>                | asel_s0267.g2.t1            | asel_s0364.g19.t1           |                         |                        | asel_s0129.g1.t1        |                        |
|                                 | asel_s0267.g3_FGENESH       | asel_s0364.g20.t1           |                         |                        | asel_s0129.g2.t1        |                        |
|                                 | asel_s0364.g15_FGENESH      | asel_s0502.g1.t1_A          |                         |                        | asel_s0129.g3.t1        |                        |
|                                 | asel_s0364.g17.t1_A         | asel_s0502.g1.t1_B          |                         |                        | asel_s1654.g2_FGENESH   |                        |
|                                 | asel_s0364.g17.t1_B         | asel_s2008.g1.t1            |                         |                        |                         |                        |
|                                 | asel_s0364.g18.t1           |                             |                         |                        |                         |                        |
| <i>A. cytherea</i>              | acyt_s0089.g41.t1_A         | acyt_s0211.g25_FGENESH      | acyt_s0116.g40.t1       |                        | acyt_s0010.g54.t1       |                        |
|                                 | acyt_s0211.g18_FGENESH      | acyt_s0211.g26_FGENESH      | acyt_s0141.g22.t1       |                        | acyt_s0010.g55.t1       |                        |
|                                 | acyt_s0211.g19_FGENESH      | acyt_s0426.g1.t1            | acyt_s0416.g3.t1        |                        | acyt_s0010.g57.t1       |                        |
|                                 | acyt_s0211.g20.t1           | acyt_s0996.g1_FGENESH       |                         |                        | acyt_s0010.g58.t1       |                        |
|                                 | acyt_s0211.g22_FGENESH      |                             |                         |                        | acyt_s1086.g1_FGENESH   |                        |
| <i>A. hyacinthus</i>            | ahya_s0024.g65_FGENESH      | ahya_s0186.g17.t1_C         | ahya_s0058.g36.t1       |                        | ahya_s0322.g5_FGENESH   |                        |
|                                 | ahya_s0186.g13.t1           | ahya_s0186.g18.t1           |                         |                        | ahya_s0322.g6.t1        |                        |
|                                 | ahya_s0186.g14_FGENESH      | ahya_s0186.g19.t1           |                         |                        | ahya_s0322.g7.t1        |                        |
|                                 | ahya_s0186.g16_FGENESH      | ahya_s0340.g1.t1_A          |                         |                        | ahya_s0699.g1_FGENESH   |                        |
|                                 | ahya_s0186.g17.t1_A_FGENESH | ahya_s0628.g2_FGENESH       |                         |                        |                         |                        |
|                                 | ahya_s0186.g17.t1_B         |                             |                         |                        |                         |                        |

**Table S3.** Analyzed FP duplications and losses

| Node IDs *       | All          |        | GFP/ CFP         |              |        | RFP             |              |        | Chromoprotein    |              |        |
|------------------|--------------|--------|------------------|--------------|--------|-----------------|--------------|--------|------------------|--------------|--------|
|                  | Duplications | Losses | Node IDs         | Duplications | Losses | Node IDs        | Duplications | Losses | Node IDs         | Duplications | Losses |
| n9               | 0            | 1      | spis             | 0            | 2      | adig            | 0            | 0      | 99               | 0            | 0      |
| n18              | 0            | 0      | n18              | 0            | 0      | n7              | 0            | 0      | n18              | 0            | 0      |
| ayon             | 3            | 0      | asel             | 1            | 0      | anas            | 0            | 1      | n21              | 0            | 0      |
| aacu             | 0            | 0      | 100              | 0            | 1      | n28             | 2            | 0      | aawi             | 0            | 1      |
| amur             | 1            | 3      | n21              | 0            | 0      | aech            | 0            | 0      | asel             | 0            | 0      |
| n28              | 11           | 0      | acyt             | 0            | 0      | meff            | 0            | 1      | 100              | 0            | 0      |
| 99               | 2            | 0      | ayon             | 0            | 0      | asel            | 0            | 3      | n26              | 0            | 0      |
| 100              | 0            | 1      | n32              | 0            | 0      | amur            | 1            | 0      | n23              | 0            | 0      |
| n32              | 0            | 0      | anas             | 0            | 0      | aten            | 0            | 0      | adig             | 2            | 0      |
| n12              | 1            | 1      | aint             | 2            | 0      | aint            | 0            | 0      | 49               | 0            | 0      |
| n23              | 0            | 1      | n15              | 0            | 1      | n23             | 0            | 0      | n12              | 0            | 0      |
| ahya             | 2            | 2      | n28              | 6            | 0      | 49              | 0            | 0      | aacu             | 0            | 0      |
| n21              | 0            | 0      | n12              | 0            | 1      | n27             | 0            | 0      | n9               | 0            | 0      |
| aten             | 0            | 6      | 99               | 0            | 0      | n9              | 0            | 0      | acyt             | 1            | 0      |
| n34              | 0            | 0      | aawi             | 0            | 3      | agem            | 0            | 2      | ahya             | 0            | 0      |
| n26              | 0            | 0      | adig             | 1            | 0      | amic            | 2            | 0      | n32              | 0            | 0      |
| aawi             | 1            | 4      | n23              | 0            | 1      | n18             | 0            | 0      | aten             | 0            | 2      |
| n27              | 0            | 1      | aten             | 0            | 4      | n32             | 0            | 0      | n25              | 1            | 0      |
| aint             | 4            | 0      | amur             | 0            | 3      | n31             | 0            | 0      | n27              | 0            | 0      |
| n36              | 4            | 0      | n7               | 0            | 0      | n26             | 0            | 0      | aint             | 2            | 0      |
| spis             | 0            | 2      | aflo             | 0            | 0      | n25             | 0            | 1      | ayon             | 3            | 0      |
| n25              | 1            | 1      | n27              | 0            | 1      | n12             | 1            | 0      | agem             | 0            | 0      |
| anas             | 3            | 1      | aacu             | 0            | 0      | ayon            | 0            | 0      | aech             | 0            | 3      |
| mcac             | 0            | 2      | astr             | 0            | 3      | ahya            | 0            | 2      | n7               | 0            | 2      |
| 49               | 2            | 0      | agem             | 0            | 1      | aawi            | 1            | 0      | n28              | 3            | 0      |
| asel             | 1            | 3      | meff             | 0            | 1      | n21             | 0            | 0      | amic             | 0            | 4      |
| aech             | 0            | 3      | 49               | 2            | 0      | n15             | 0            | 0      | aflo             | 0            | 0      |
| aflo             | 0            | 0      | n26              | 0            | 0      | 99              | 2            | 0      | meff             | 0            | 0      |
| amic             | 3            | 4      | n9               | 0            | 1      | aacu            | 0            | 0      | n31              | 0            | 0      |
| meff             | 0            | 2      | mcac             | 0            | 1      | aflo            | 0            | 0      | amur             | 0            | 0      |
| adig             | 3            | 0      | n36              | 4            | 0      | mcac            | 0            | 0      | n15              | 0            | 0      |
| astr             | 0            | 3      | aech             | 0            | 0      | acyt            | 0            | 0      | mcac             | 0            | 1      |
| n15              | 0            | 1      | n31              | 0            | 1      | 100             | 0            | 0      | anas             | 3            | 0      |
| agem             | 0            | 3      | amic             | 1            | 0      | Duplications: 9 |              |        | Duplications: 15 |              |        |
| n7               | 0            | 2      | ahya             | 2            | 0      | Losses: 10      |              |        | Losses: 13       |              |        |
| n31              | 0            | 1      | n25              | 0            | 0      |                 |              |        |                  |              |        |
| acyt             | 1            | 0      | n34              | 0            | 0      |                 |              |        |                  |              |        |
| Duplications: 43 |              |        | Duplications: 18 |              |        |                 |              |        |                  |              |        |
| Losses: 48       |              |        | Losses: 27       |              |        |                 |              |        |                  |              |        |

\*Node IDs and OTU (operational taxonomic unit) are shown in Figure S3.

#The numbers are shown in Figure 2A.
